# Supplementary material for: Cu-Catalyzed Oxidative 3-Amination of Indoles via Formation of Indolyl(aryl)iodonium Imides Using o-Substituted (Diacetoxyiodo)arene as a High-Performance Hypervalent Iodine Compound
Source: Molecules. 2019 Mar 22;24(6):1147. doi: 10.3390/molecules24061147 (PMC6471596; doi:10.3390/molecules24061147)

## Supporting Information for

# Cu-Catalyzed Oxidative 3-Amination of Indoles via Formation of Indolyl(aryl)iodonium Imides Using *o*-Substituted (Diacetoxyiodo)arene as a High-Performance Hypervalent Iodine Compound

Kazuhiro Watanabe and Katsuhiko Moriyama \*

Department of Chemistry, Graduate School of Science, and Molecular Chirality Research Center, Chiba University, 1-33 Yayoi-cho, Inage-ku, Chiba 263-8522, Japan; cars9s66@chiba-u.jp

\* Correspondence: moriyama@faculty.chiba-u.jp; Tel.: +81-43-290-3693

### Table of contents

|                                                                 |       |    |
|-----------------------------------------------------------------|-------|----|
| 1. X-ray Diffraction Analysis of <b>2a</b> .                    | ----- | S2 |
| 2. <sup>1</sup> H and <sup>13</sup> C NMR Spectra of Materials. | ----- | S3 |

## 1. X-ray Diffraction Analysis of 2a.

**Crystal data for 2a:** Formula  $C_{27}H_{28}N_2O_5S_2$ , colorless, crystal dimensions  $0.30 \times 0.20 \times 0.20$  mm<sup>3</sup>, Triclinic, space group  $P\bar{1}$ ,  $a = 9.475(2)$  Å,  $b = 10.144(2)$  Å,  $c = 13.660(3)$  Å,  $\alpha = 98.118(3)^\circ$ ,  $\beta = 91.348(3)^\circ$ ,  $\gamma = 100.871(3)^\circ$ ,  $V = 1274.7(5)$  Å<sup>3</sup>,  $Z = 2$ ,  $\rho_{calc} = 1.367$  g cm<sup>-3</sup>,  $F(000) = 552$ ,  $\mu(\text{MoK}\alpha) = 0.250$  mm<sup>-1</sup>,  $T = 173$  K. 7413 reflections collected, 5602 independent reflections with  $I > 2\sigma(I)$  ( $2\theta_{max} = 27.572^\circ$ ), and 330 parameters were used for the solution of the structure. The non-hydrogen atoms were refined anisotropically.  $R_1 = 0.0508$  and  $wR_2 = 0.1031$ . GOF = 1.015. Crystallographic data (excluding structure factors) for the structure reported in this paper have been deposited with the Cambridge Crystallographic Data Centre as supplementary publication no. CCDC-1860598. Copies of the data can be obtained free of charge on application to CCDC, 12 Union Road, Cambridge CB2 1EZ, UK [Fax: int. code + 44(1223)336-0333; E-mail: deposit@ccdc.cam.ac.uk].

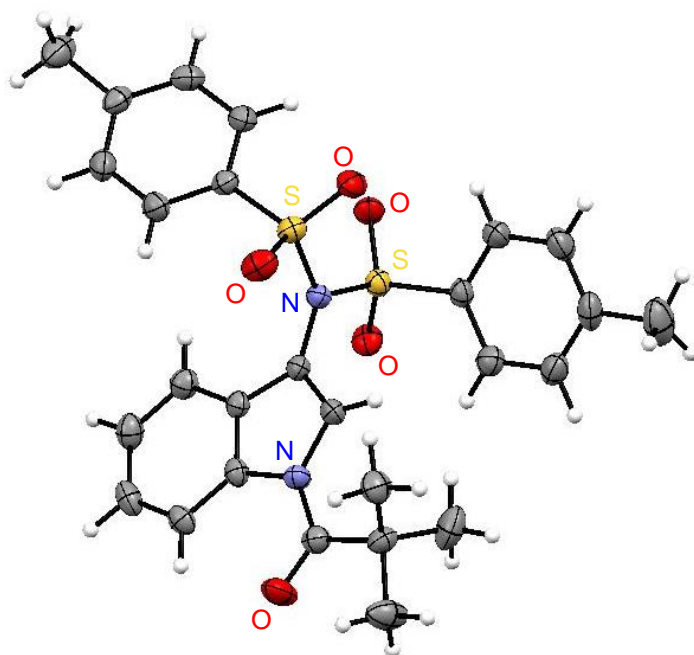

**Figure S1.** ORTEP drawing of **2a**. The ellipsoids correspond to 50% probability.

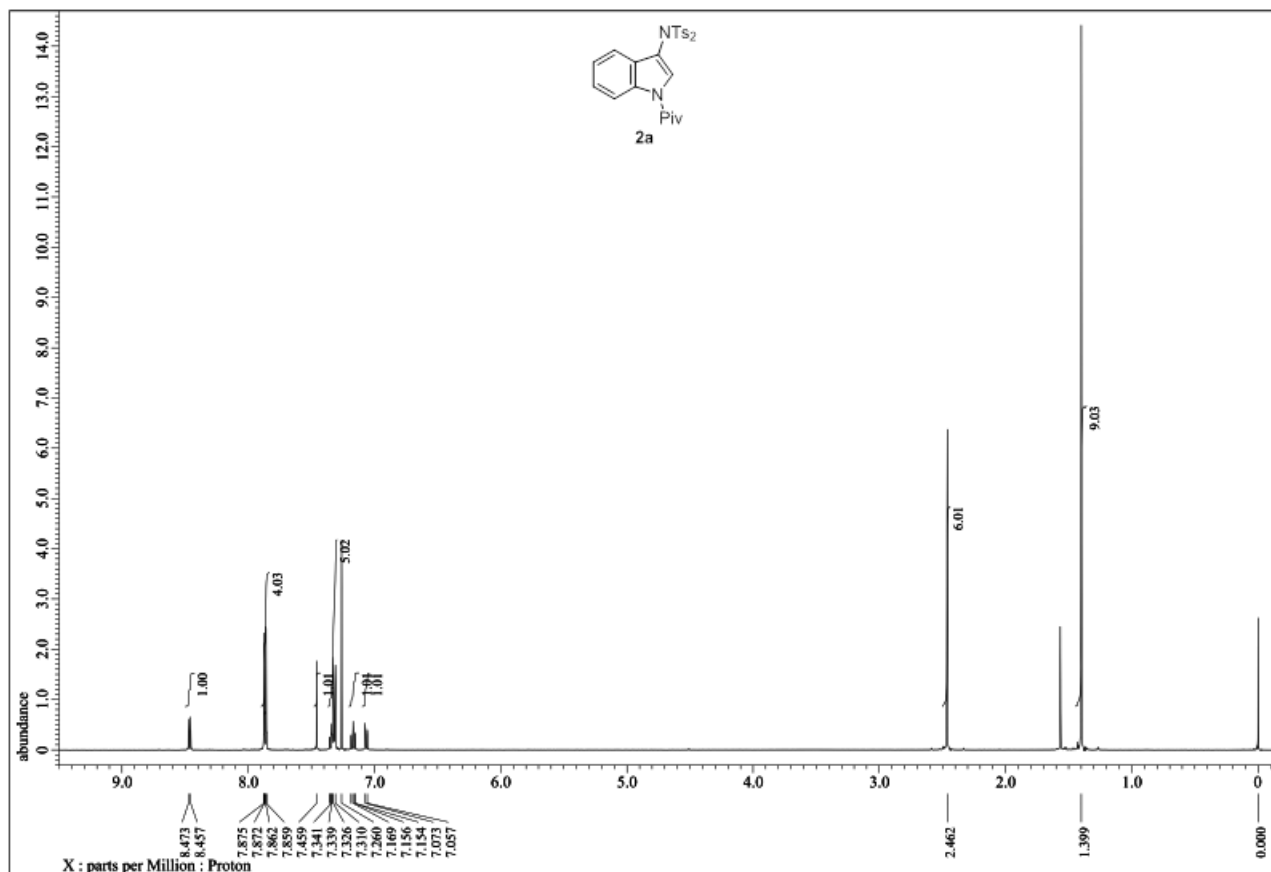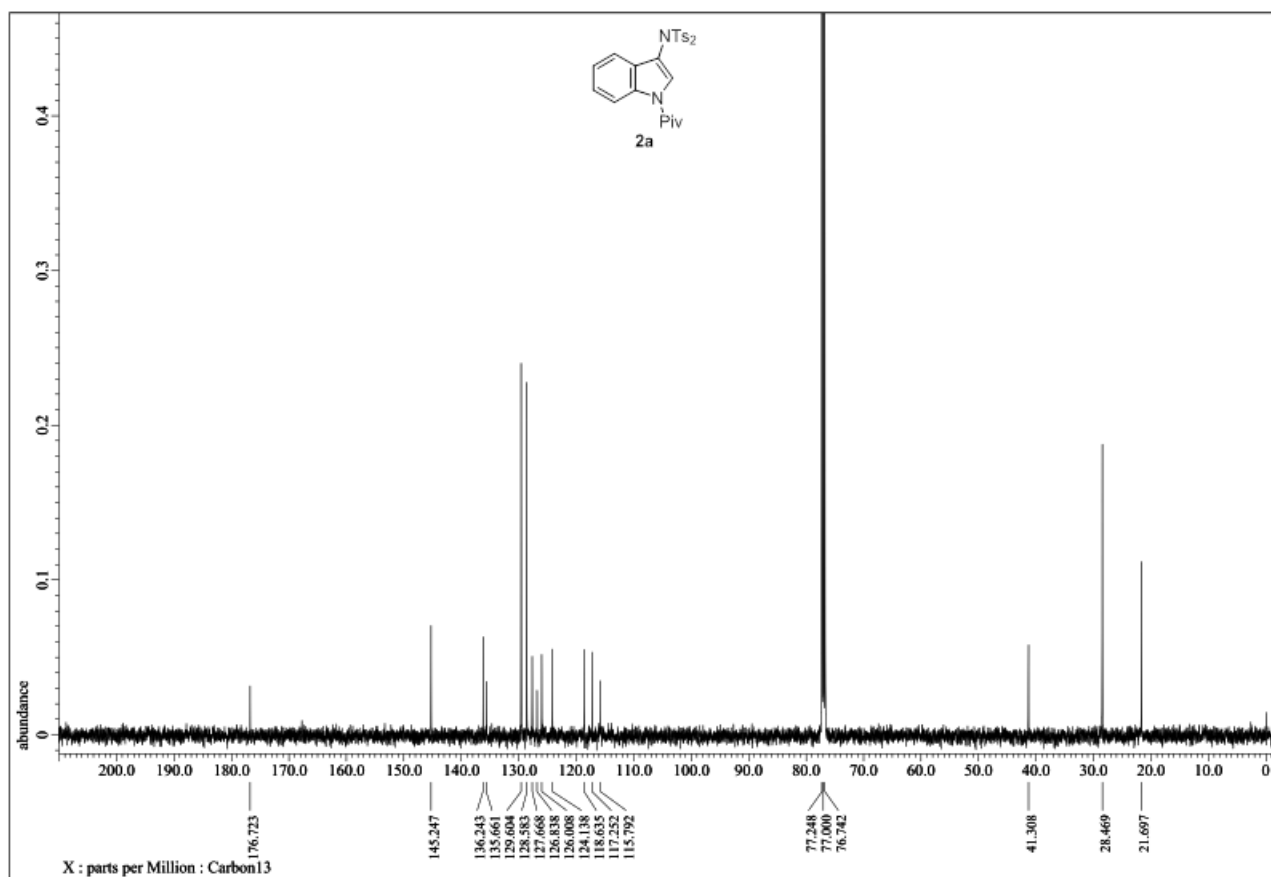

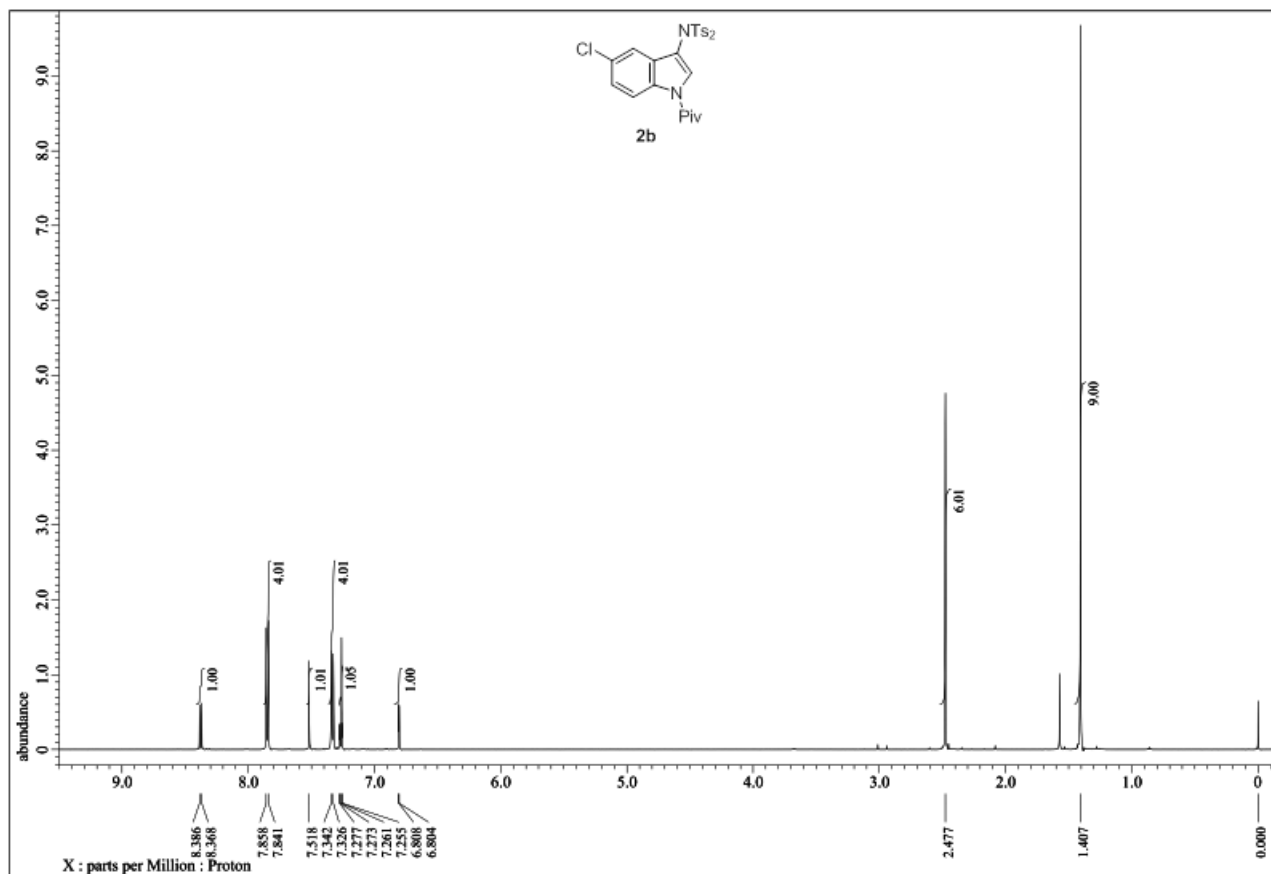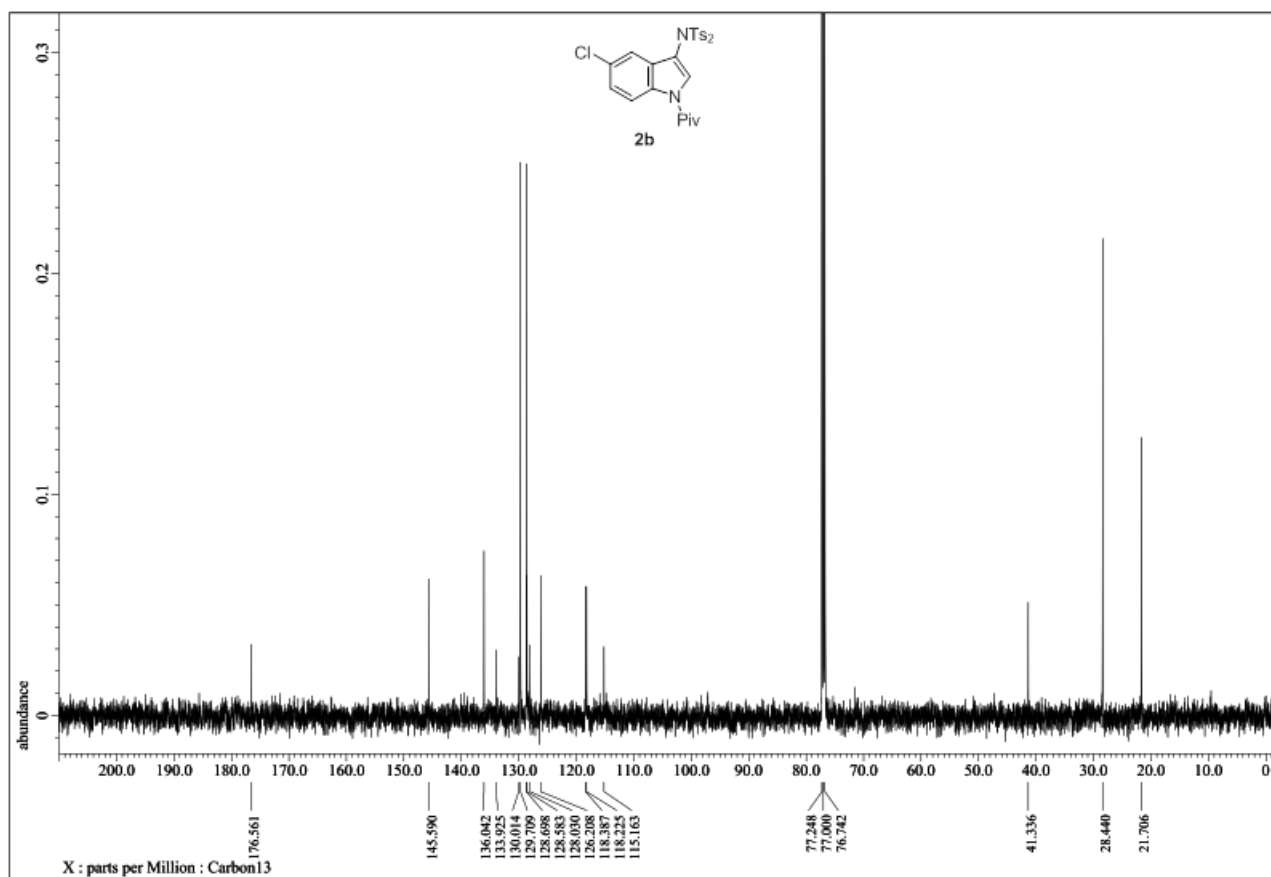

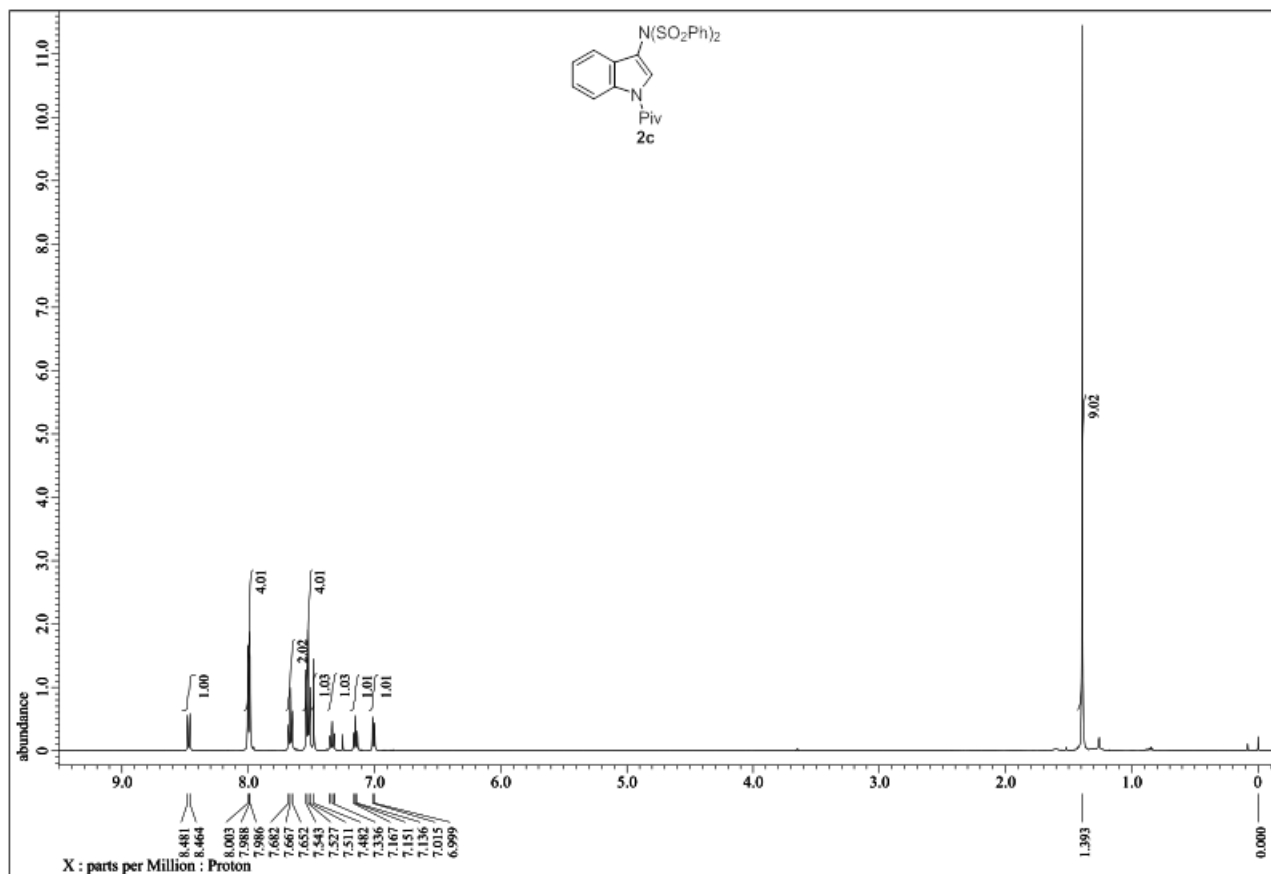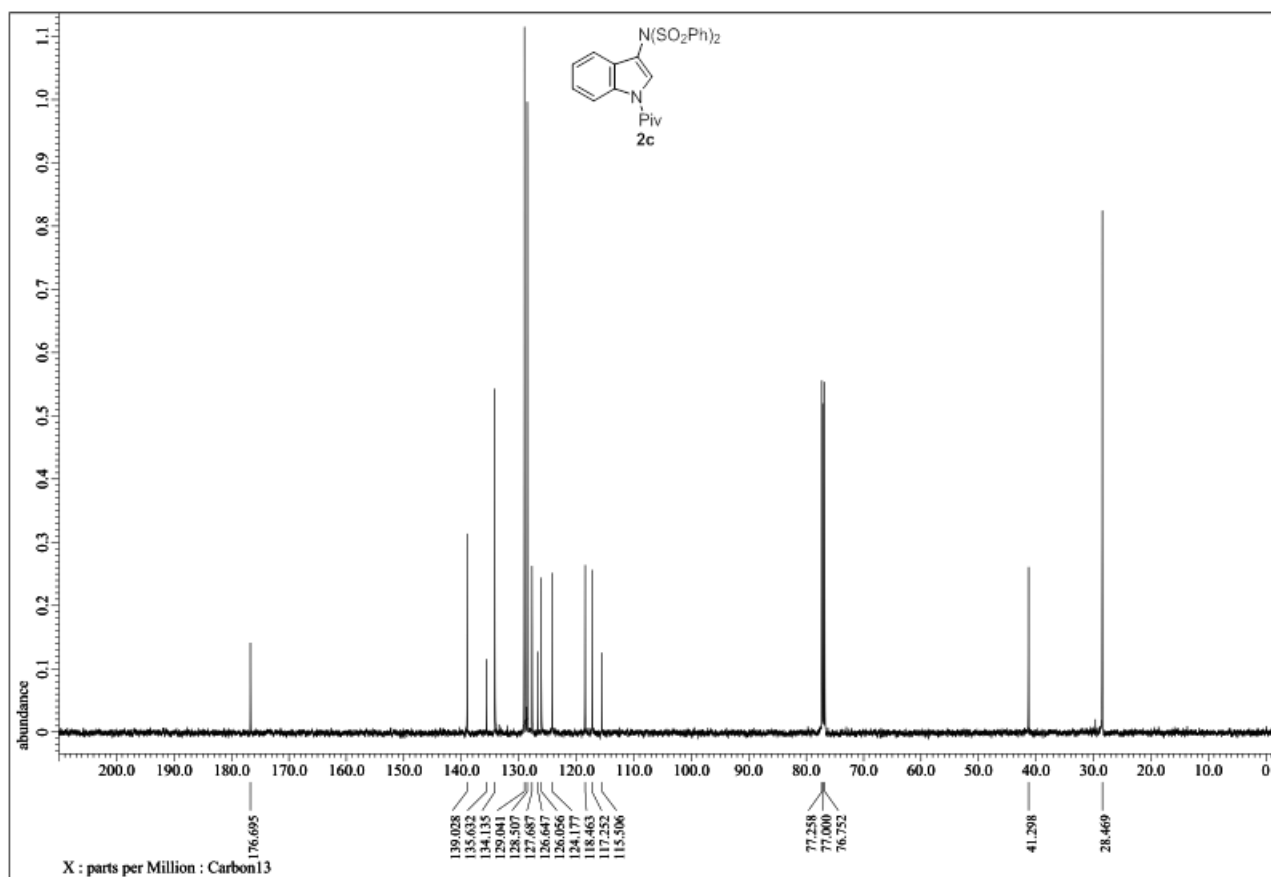

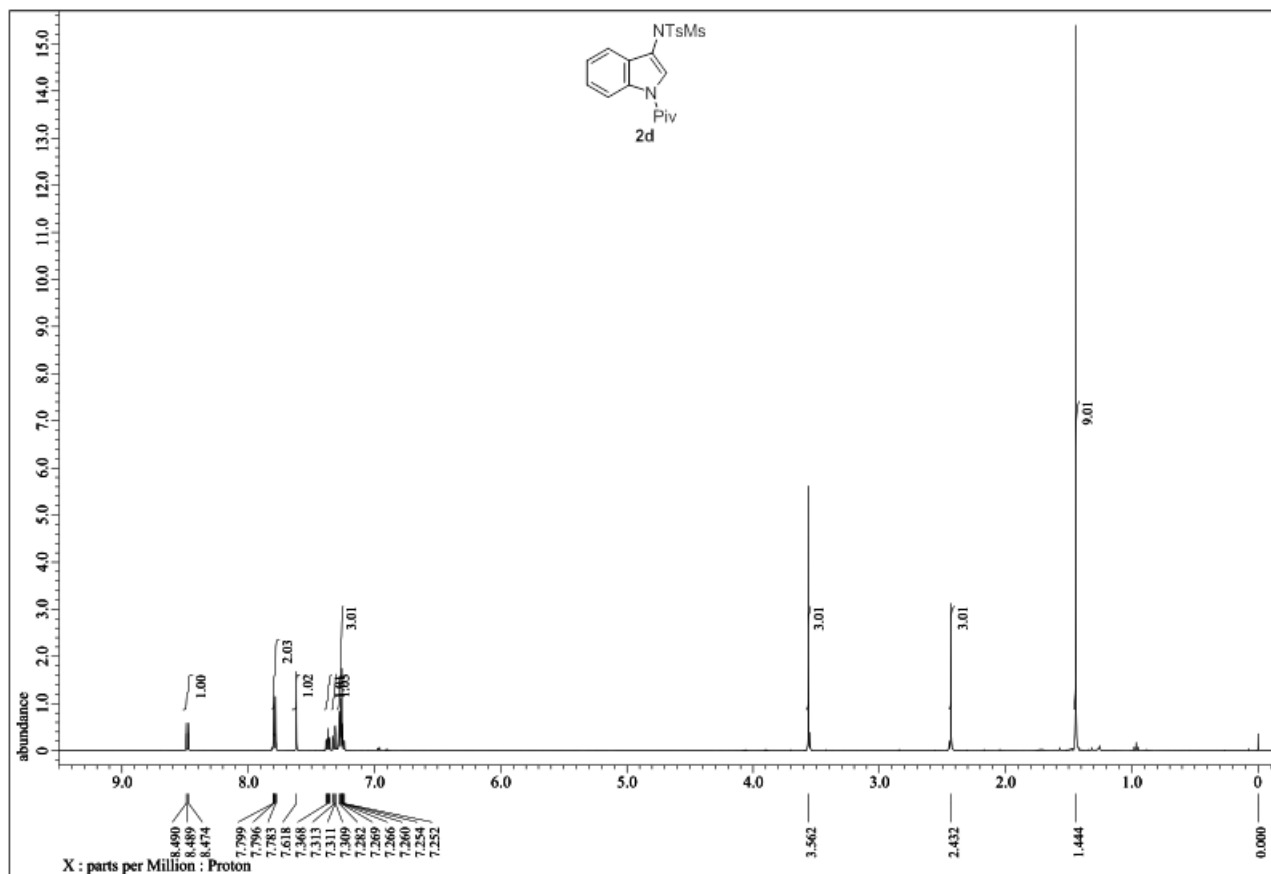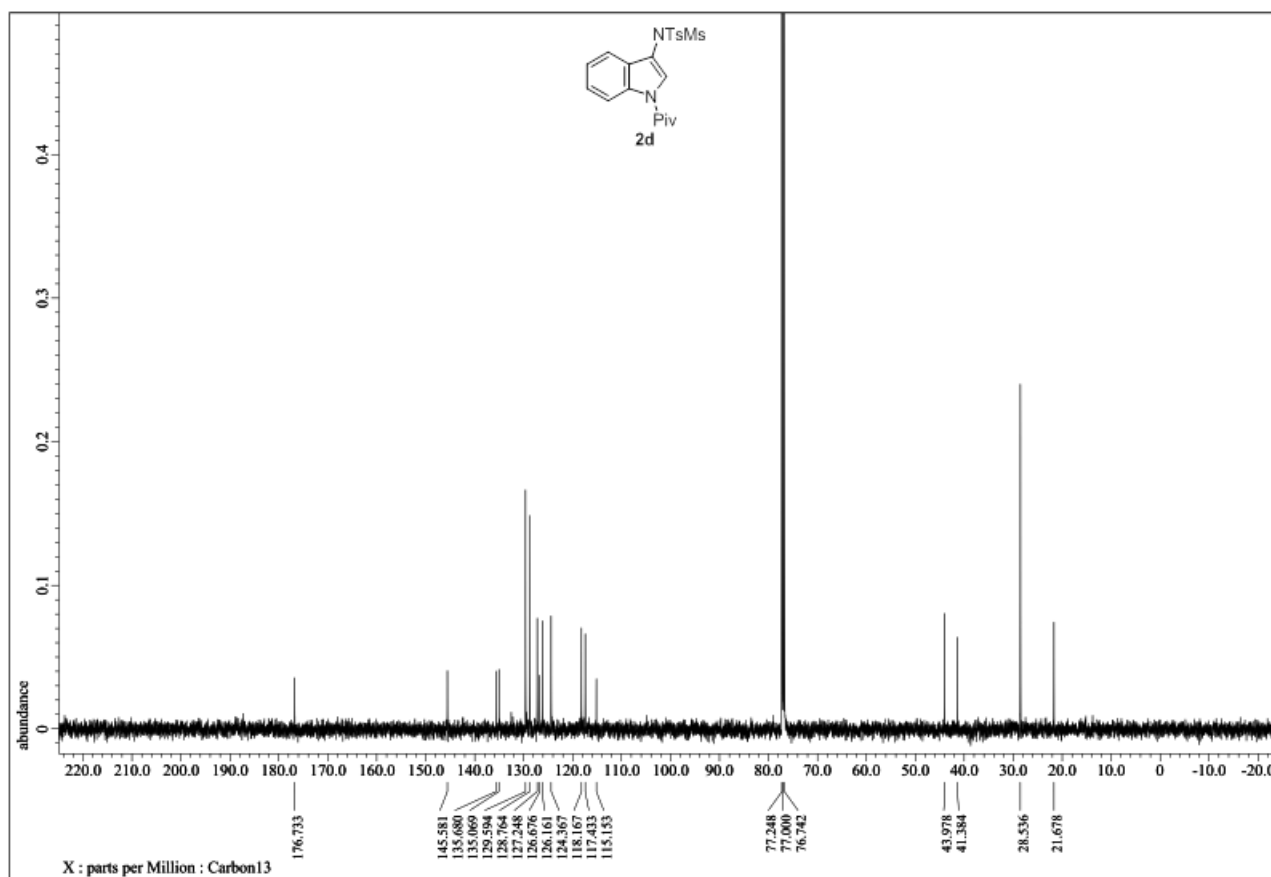

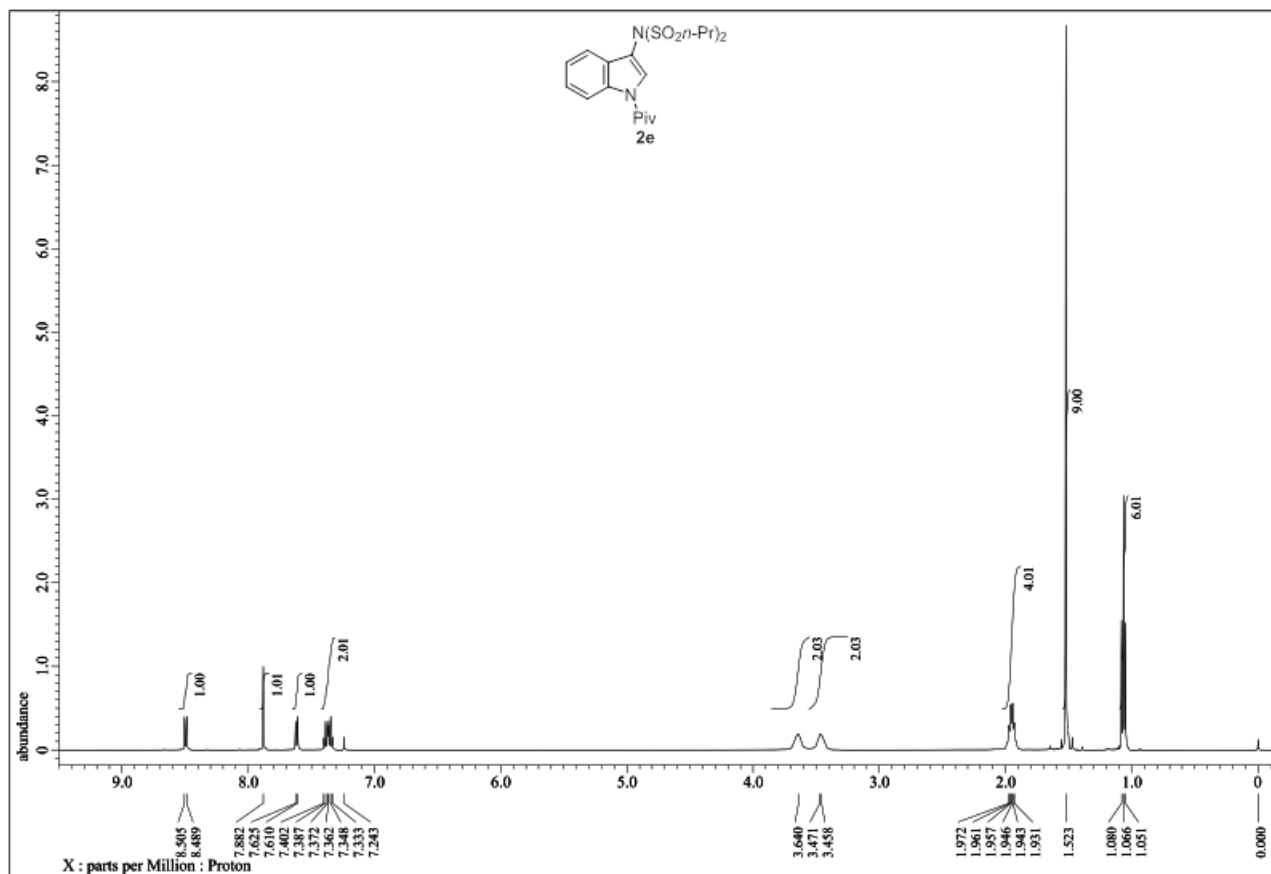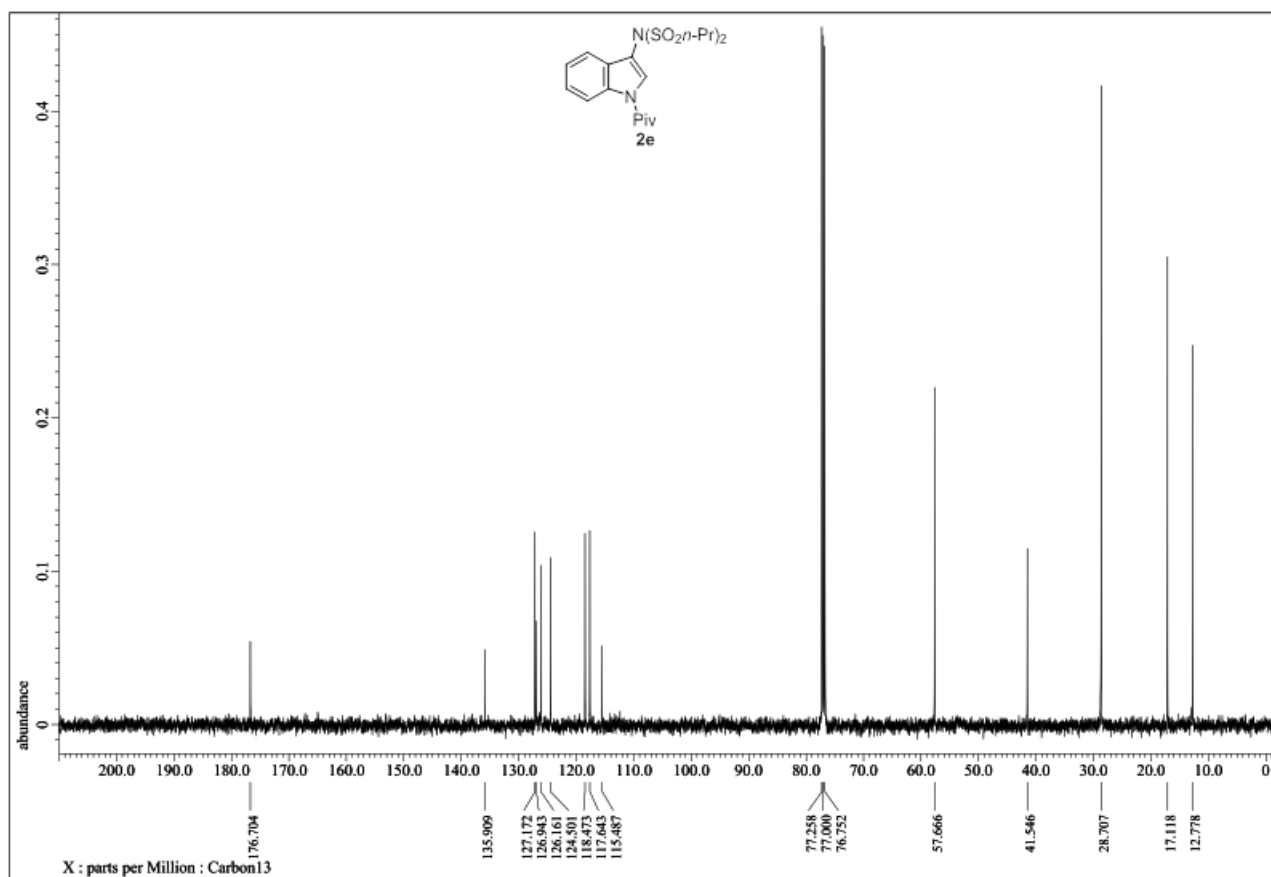

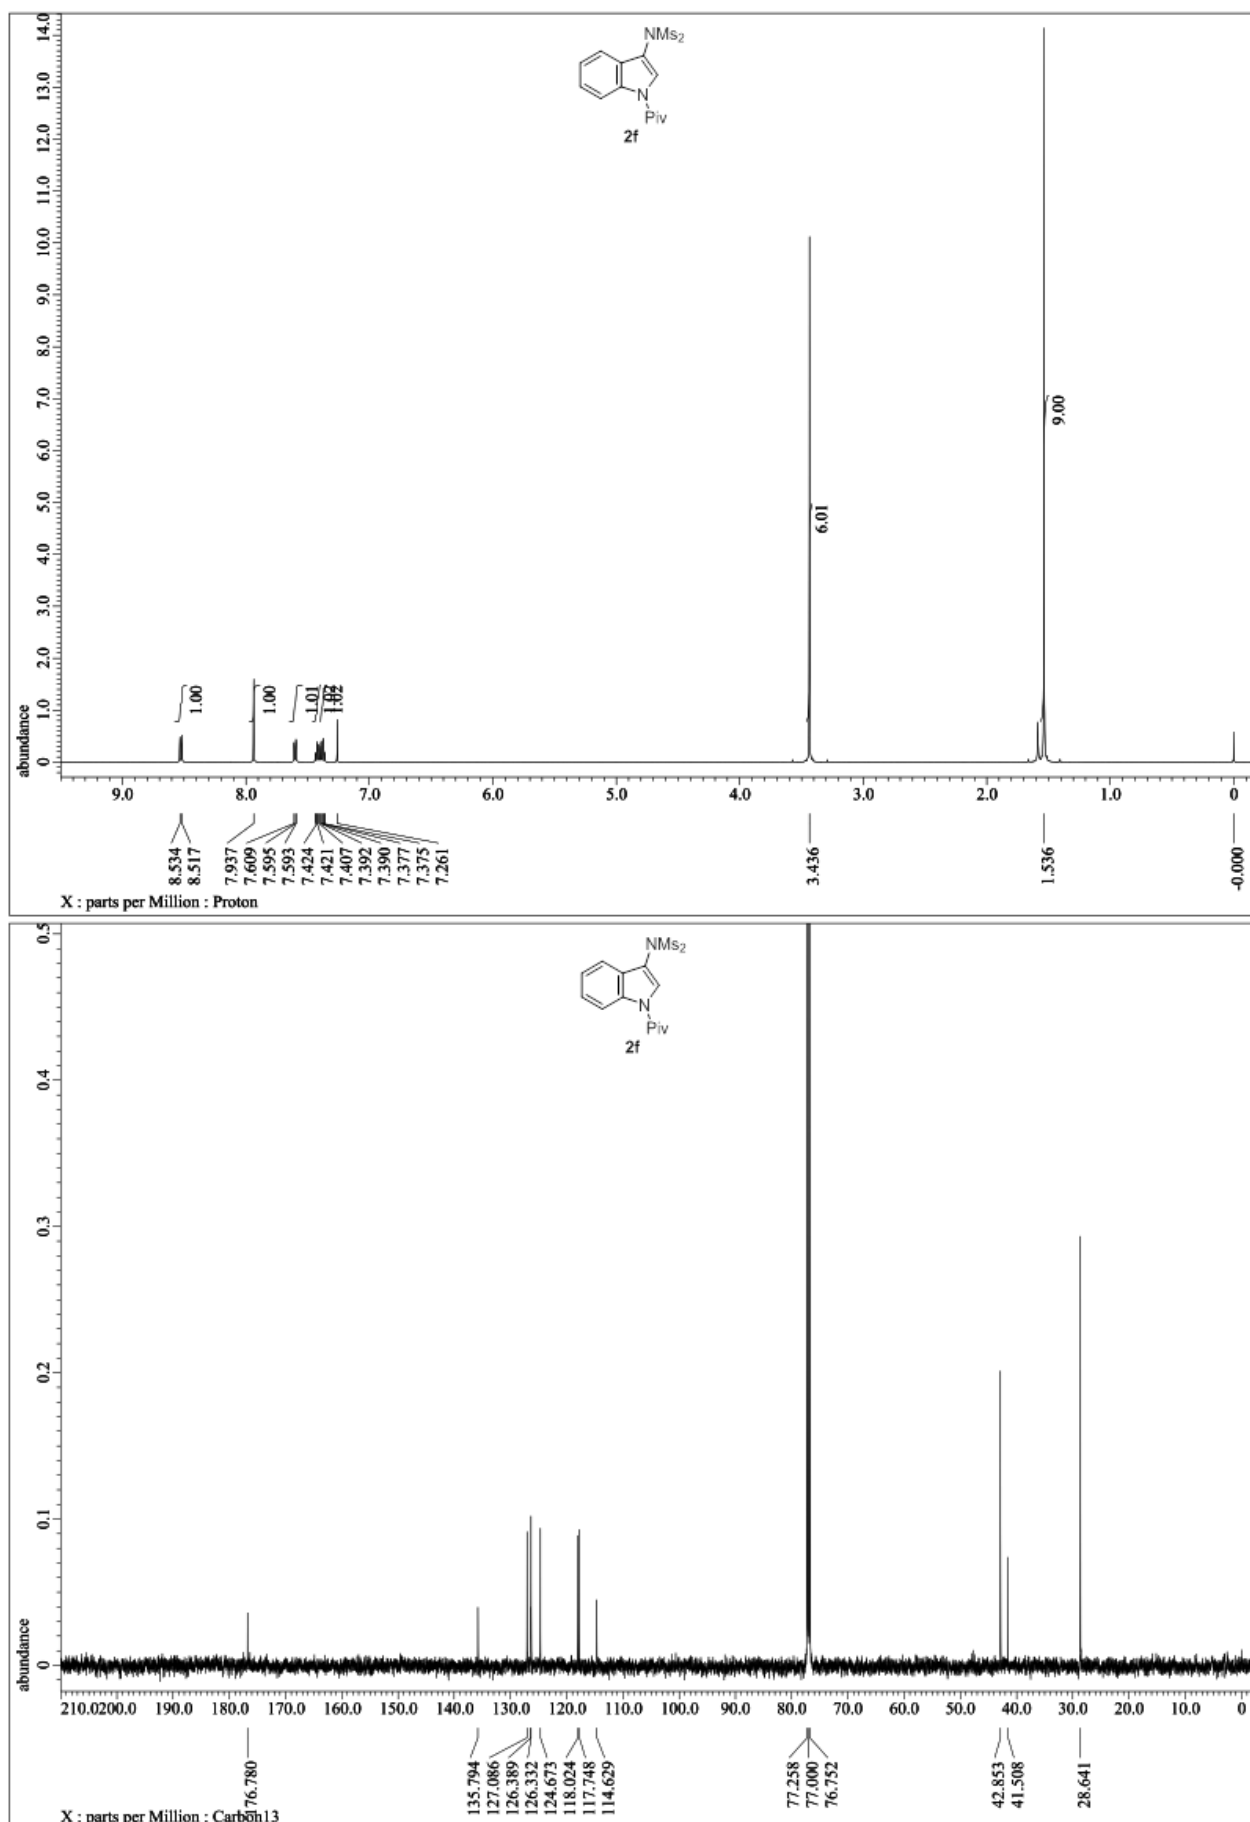

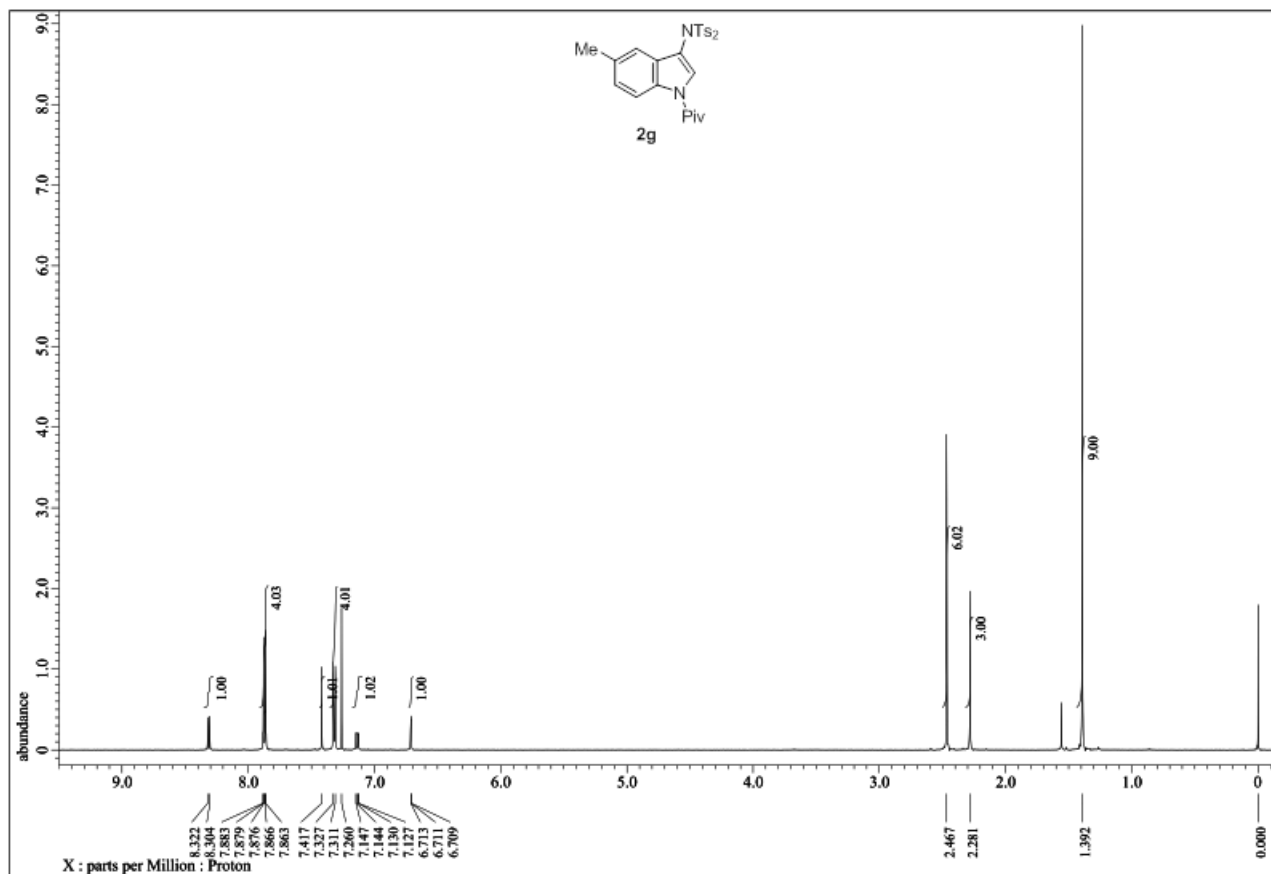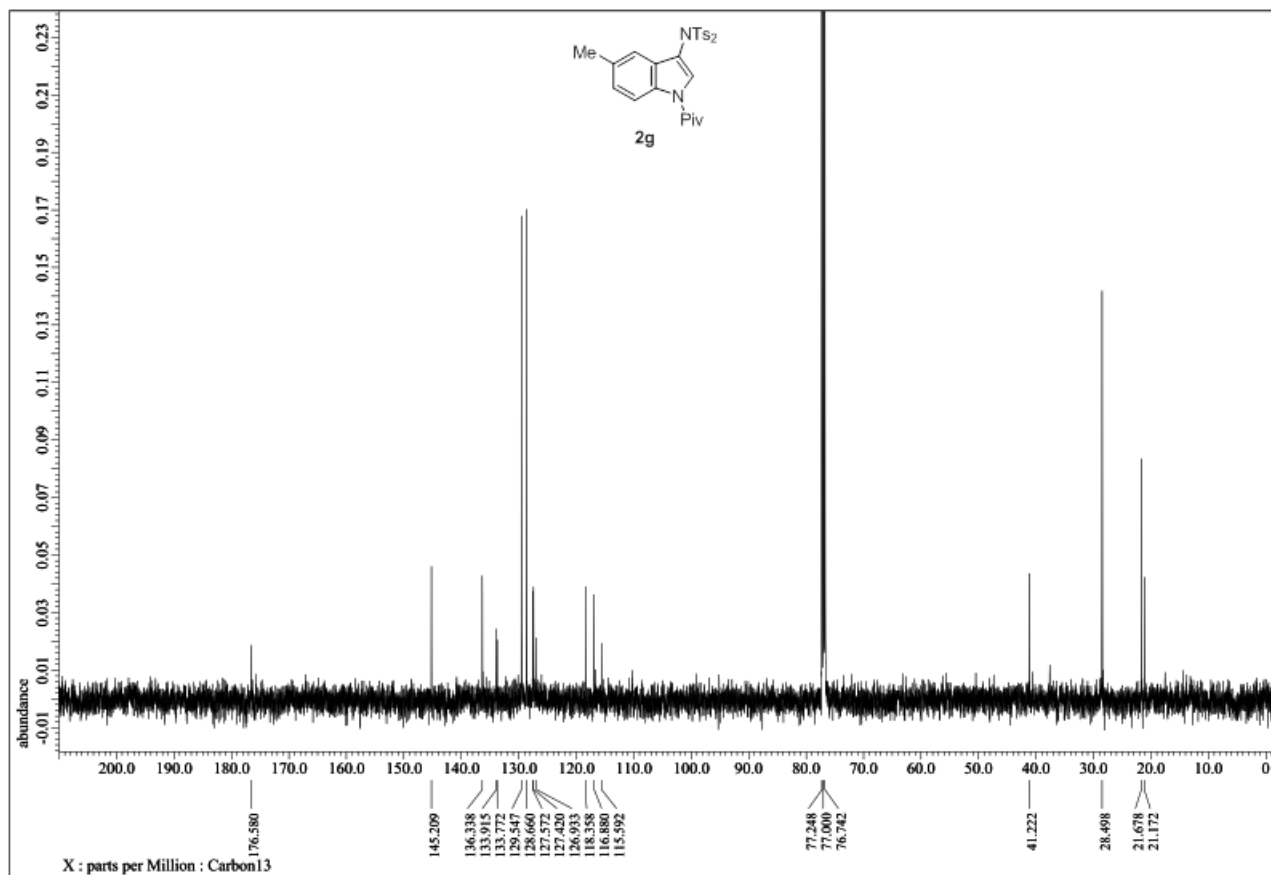

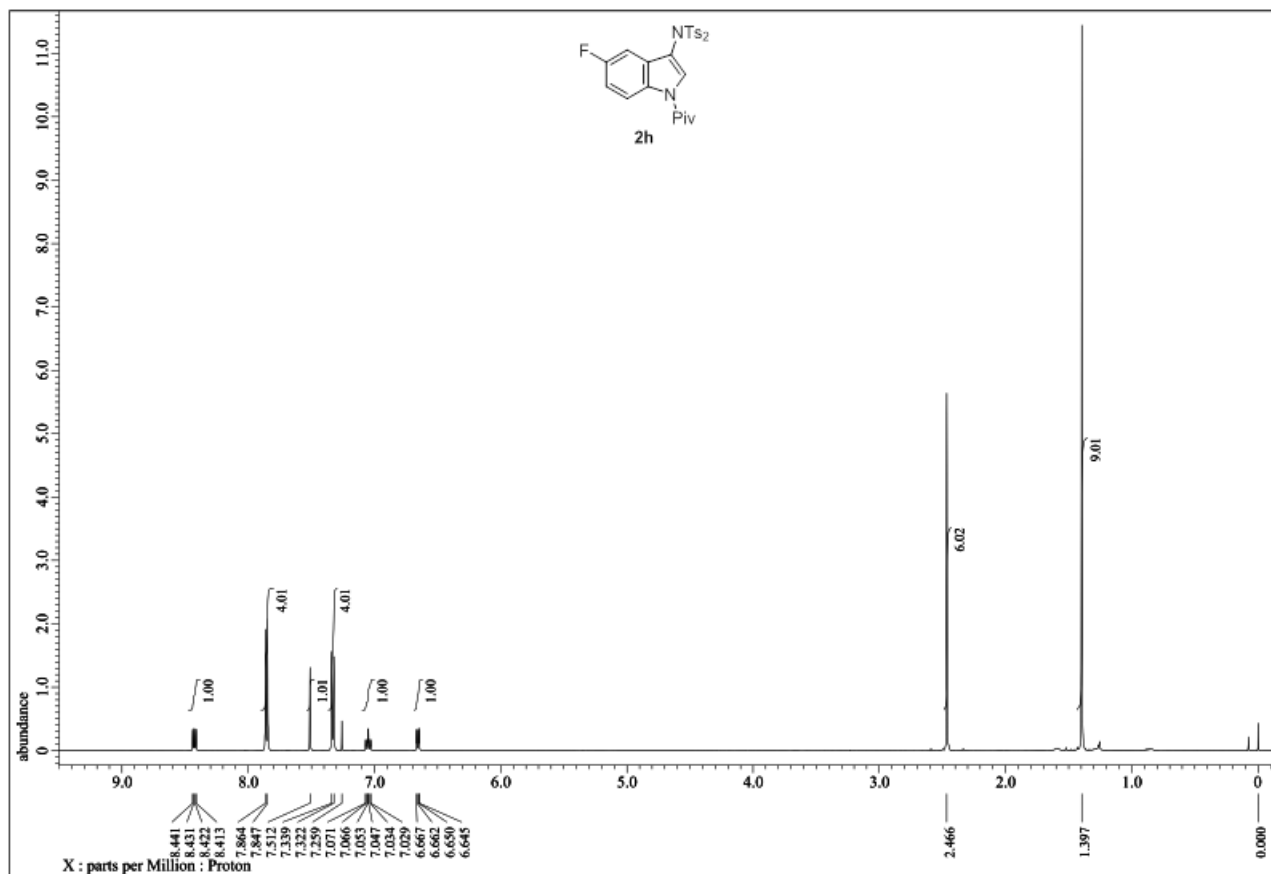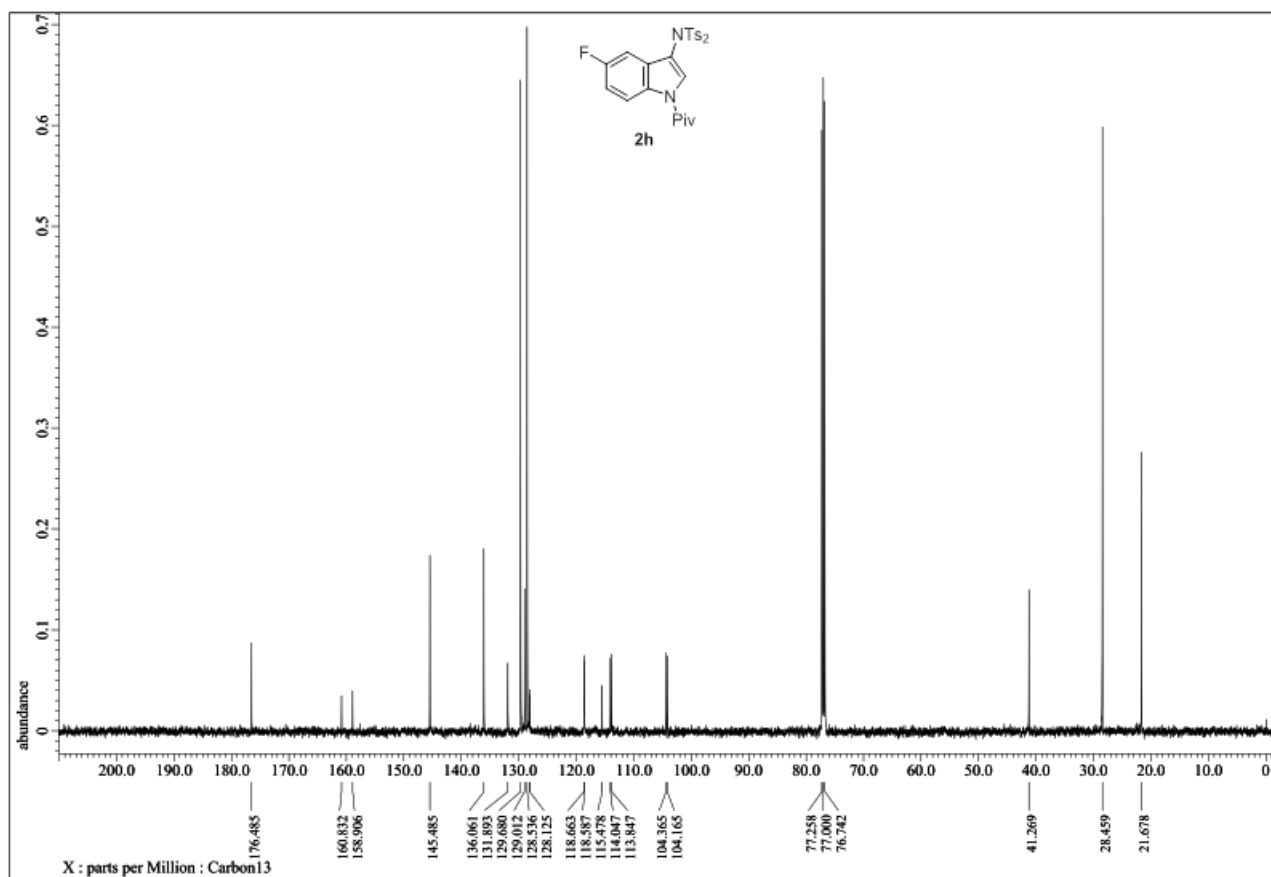

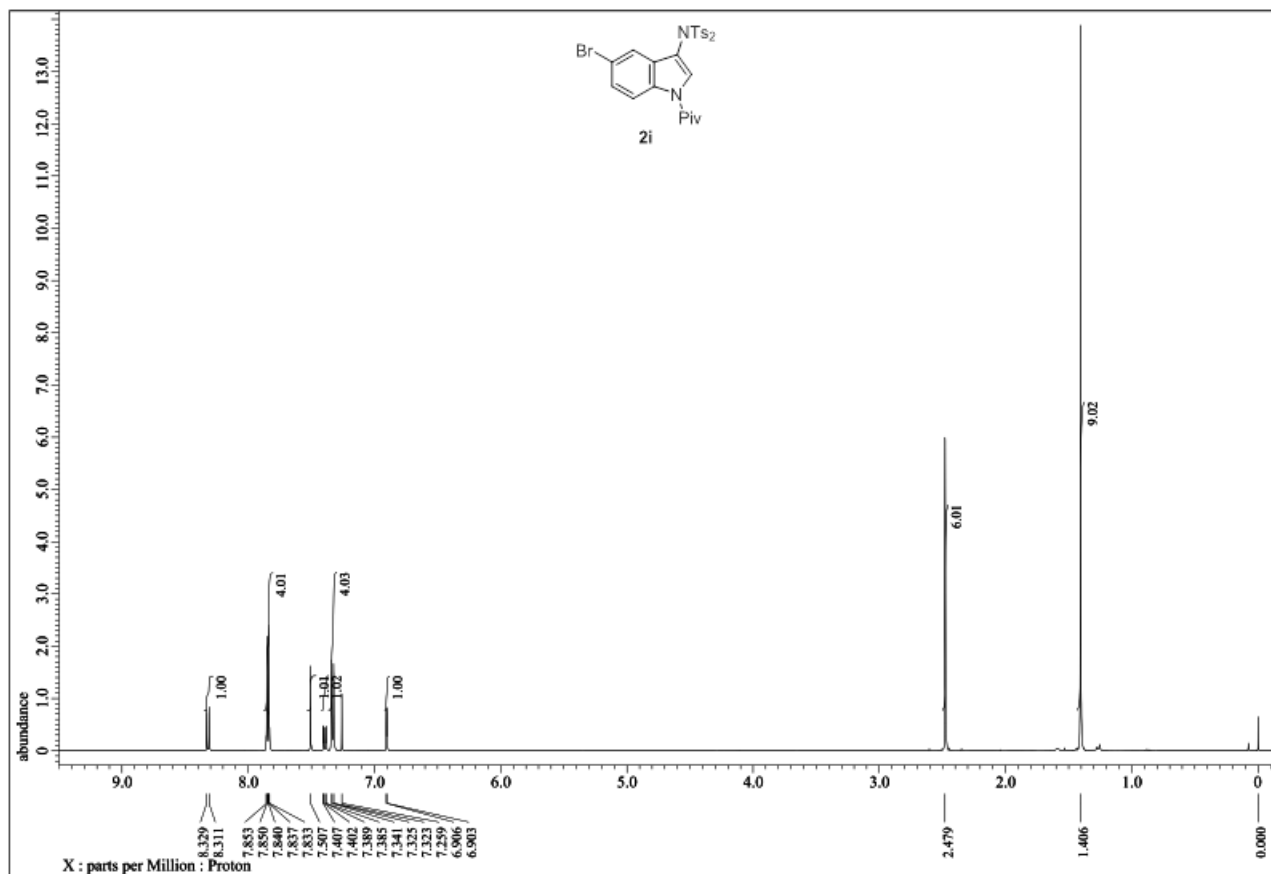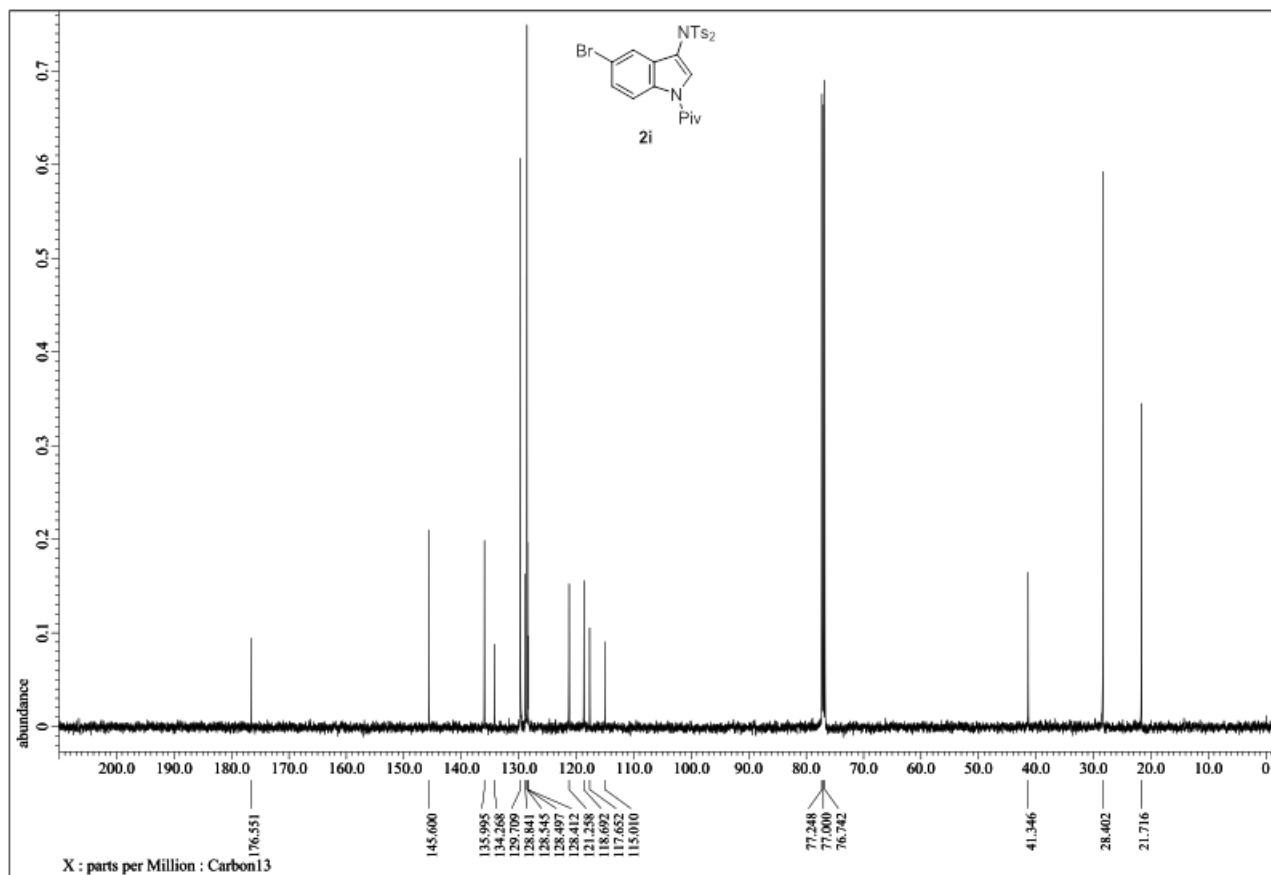

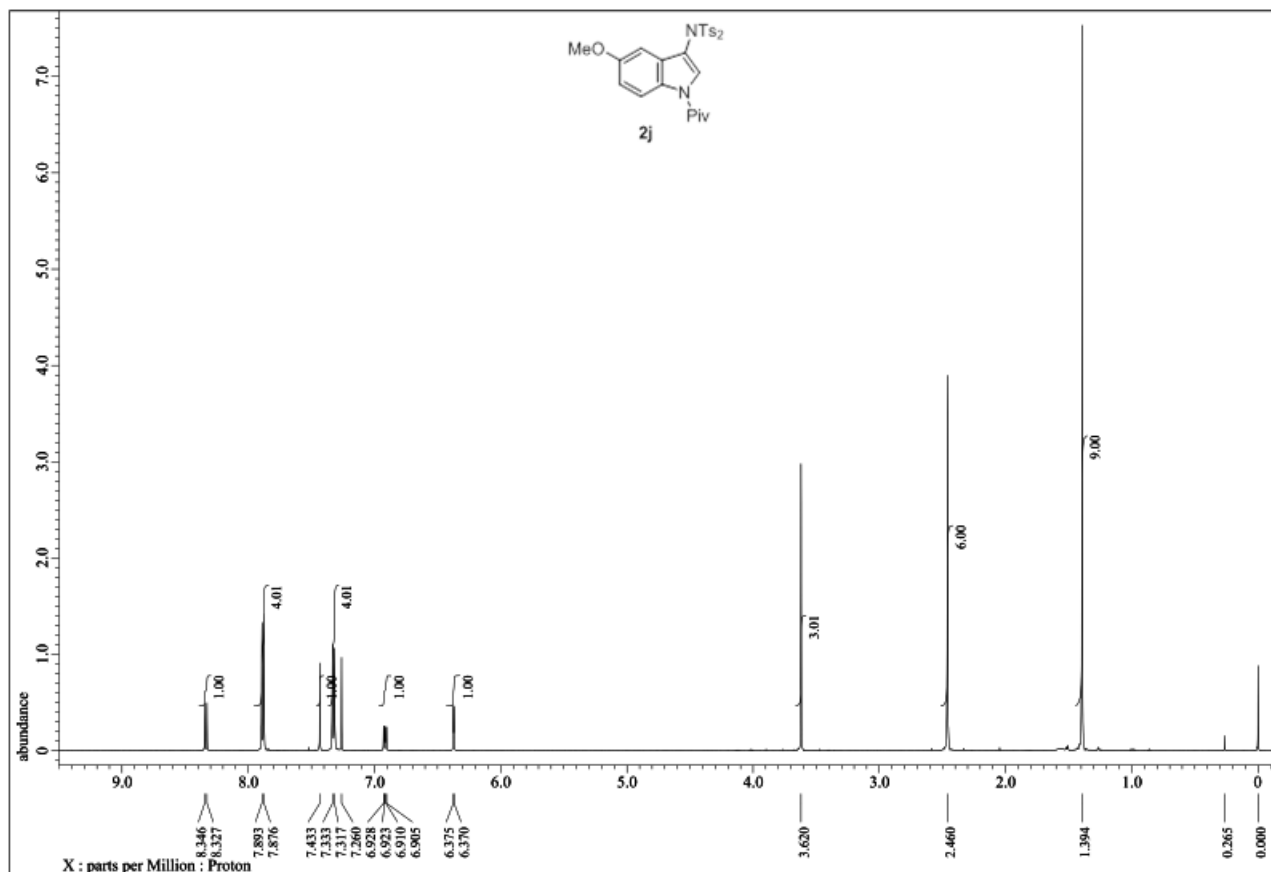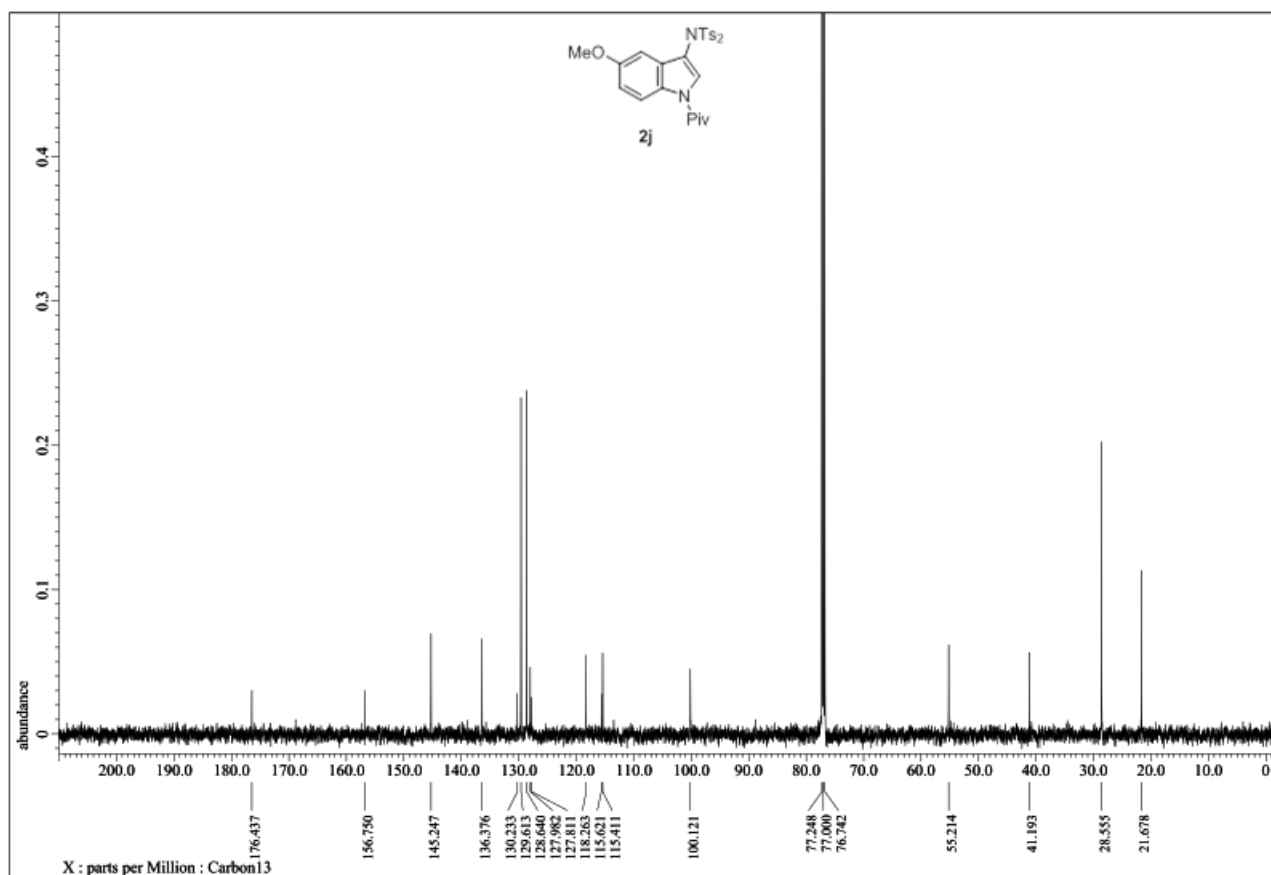

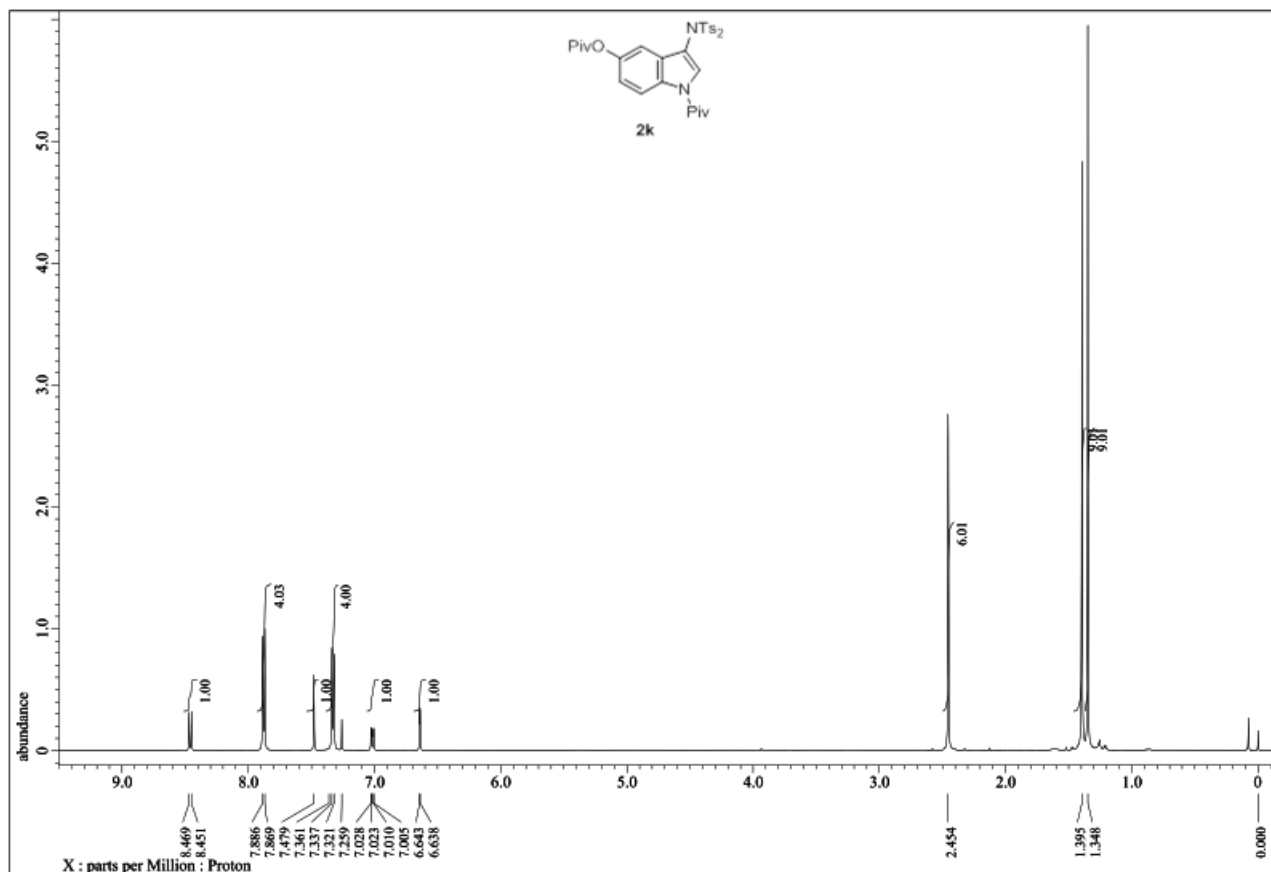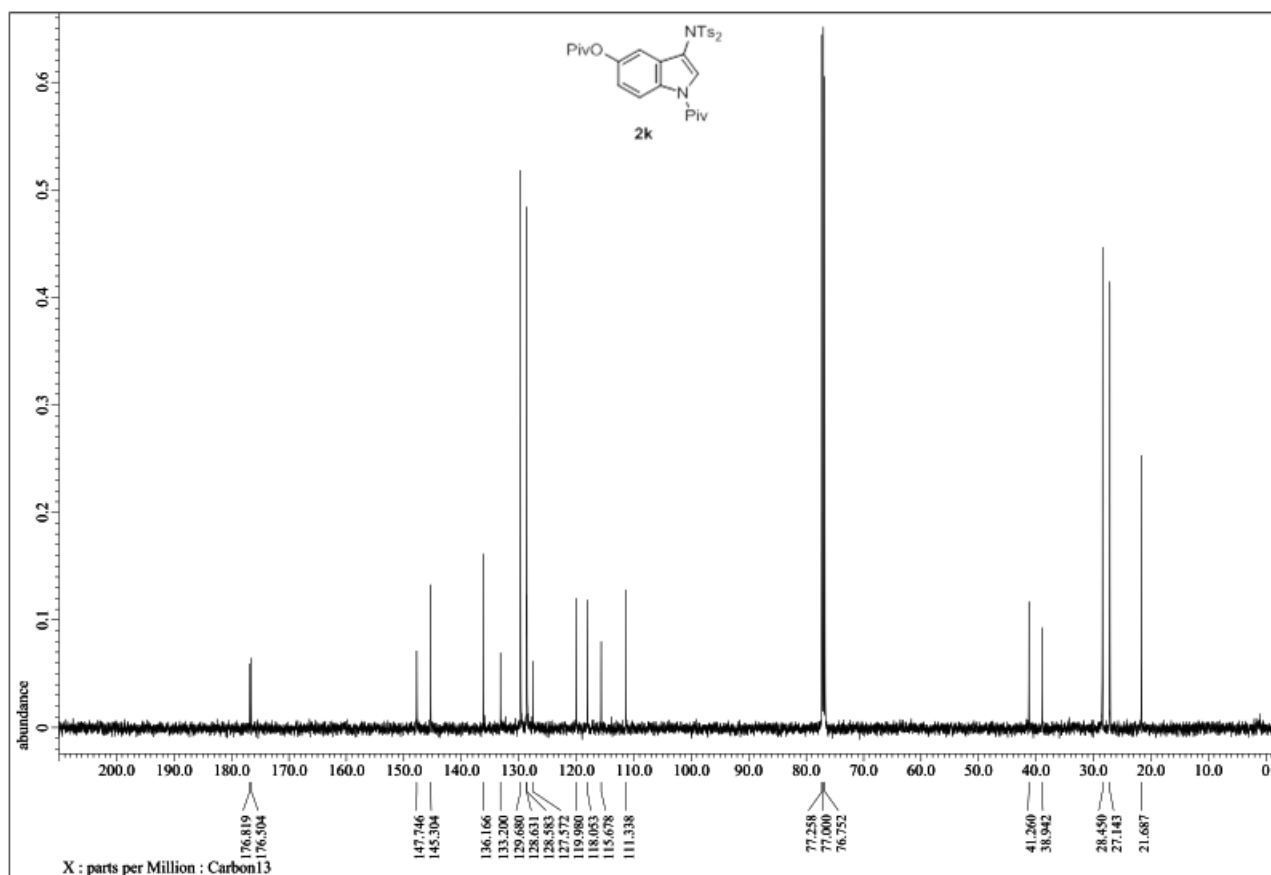

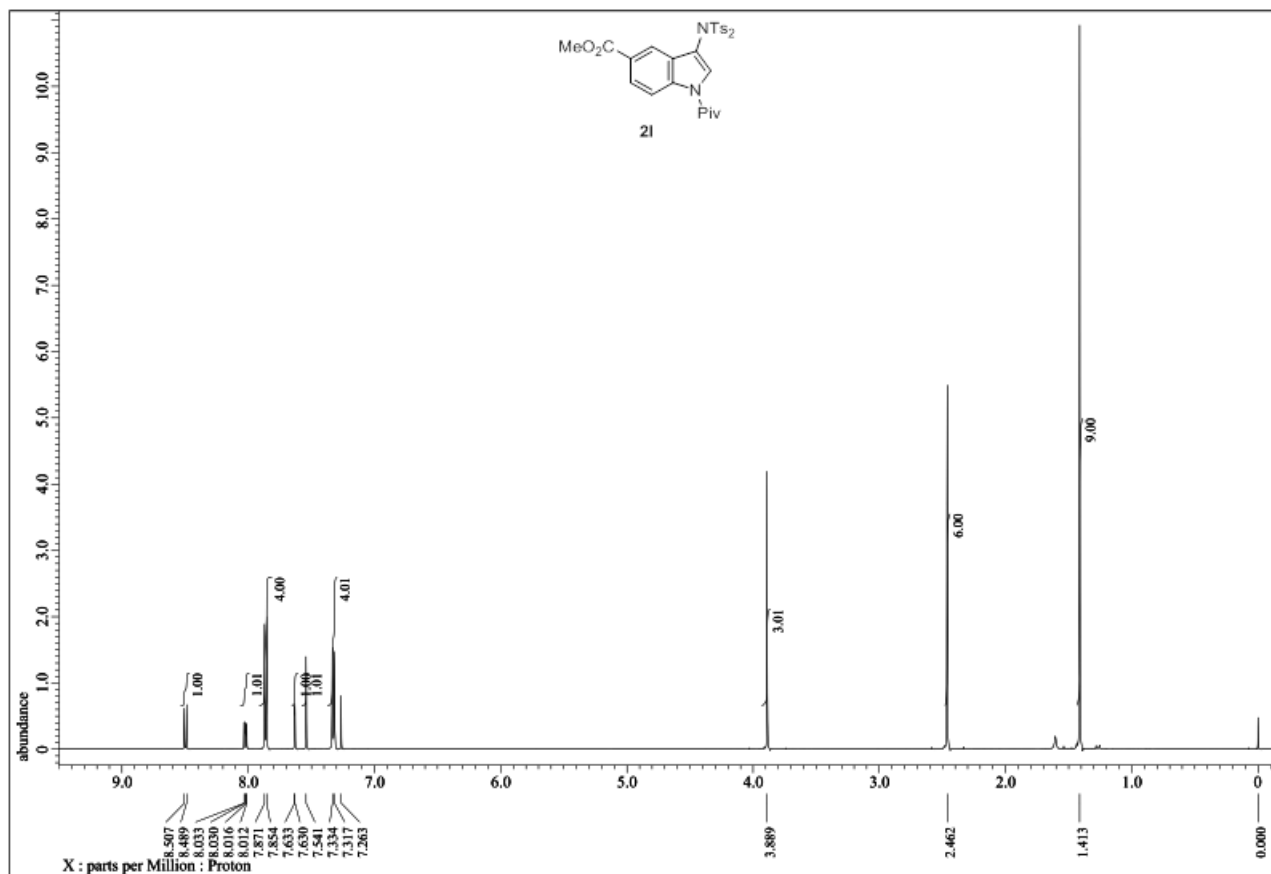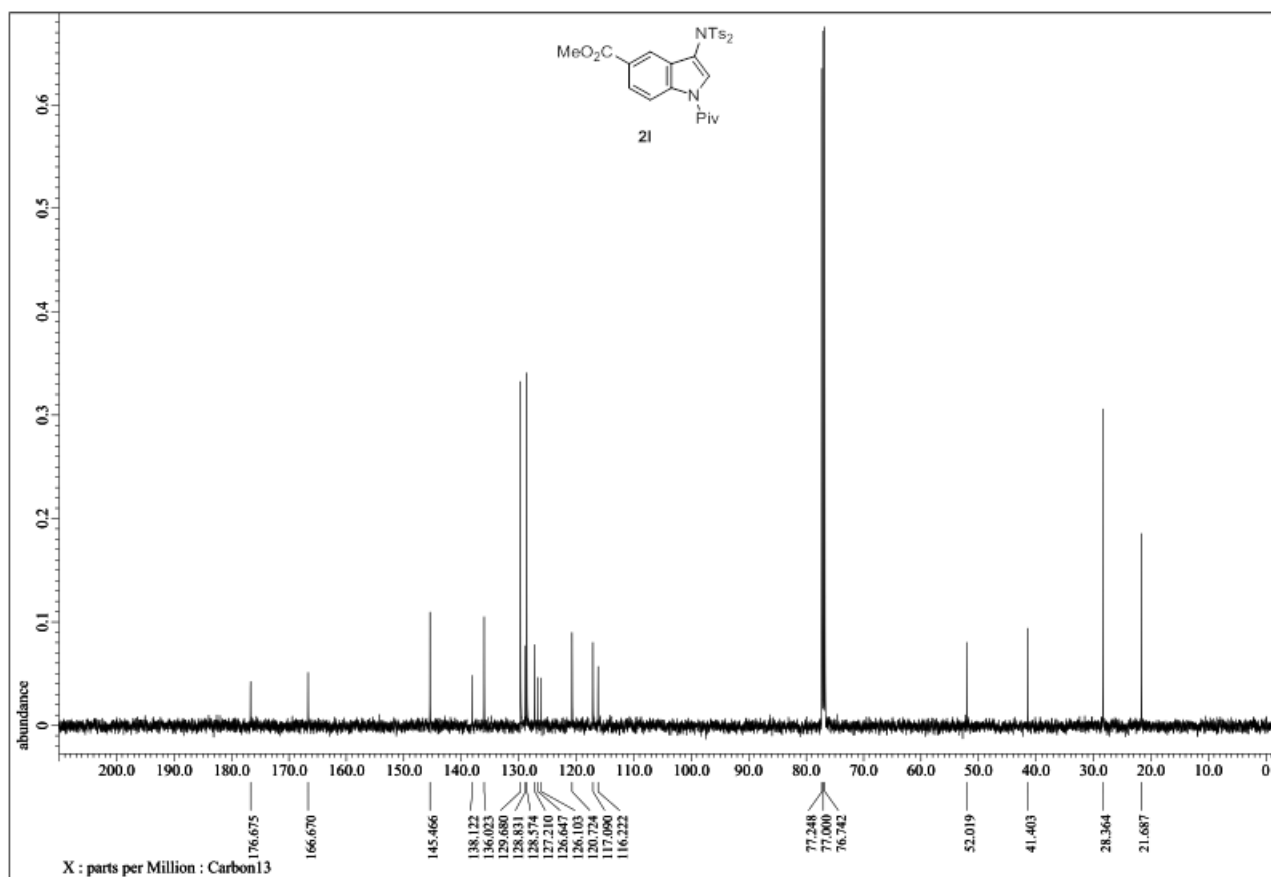

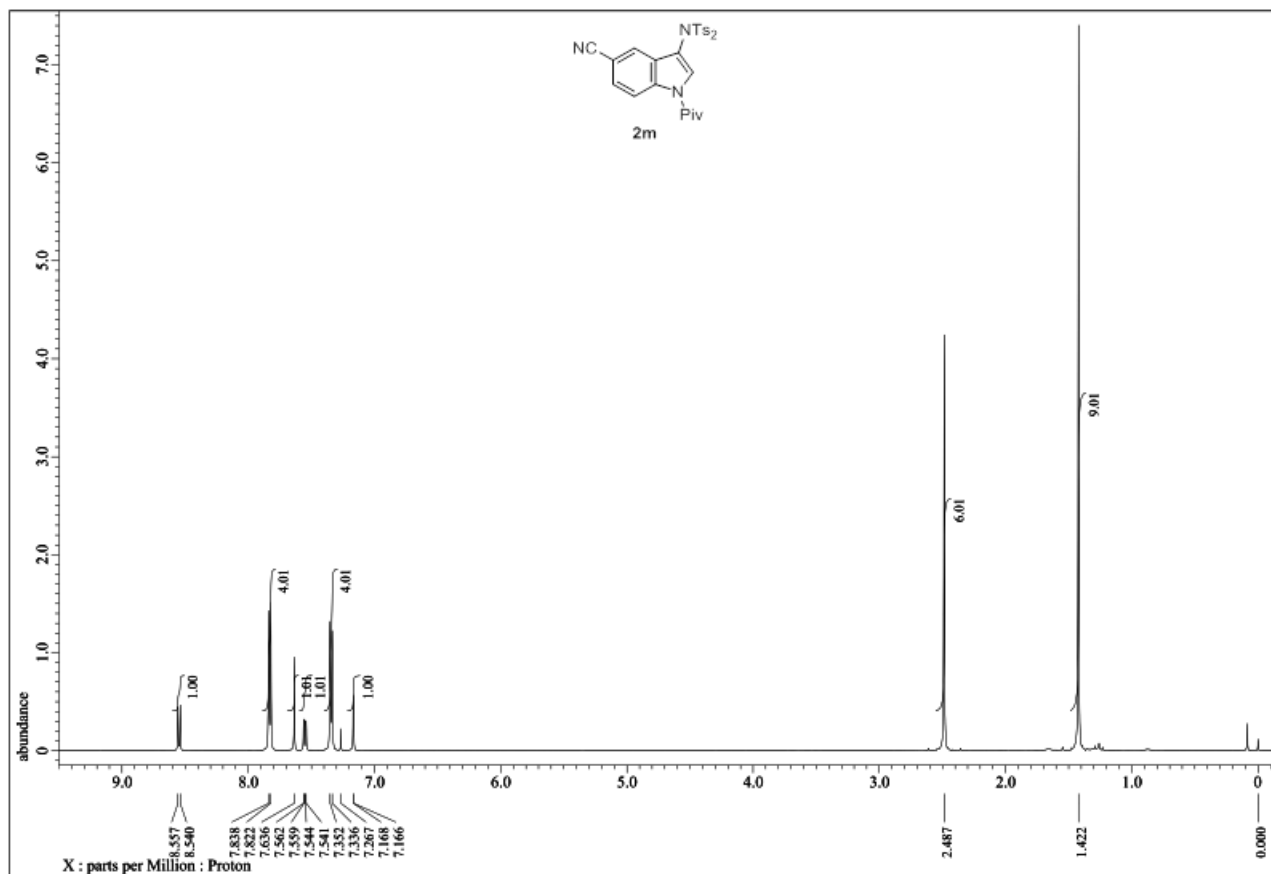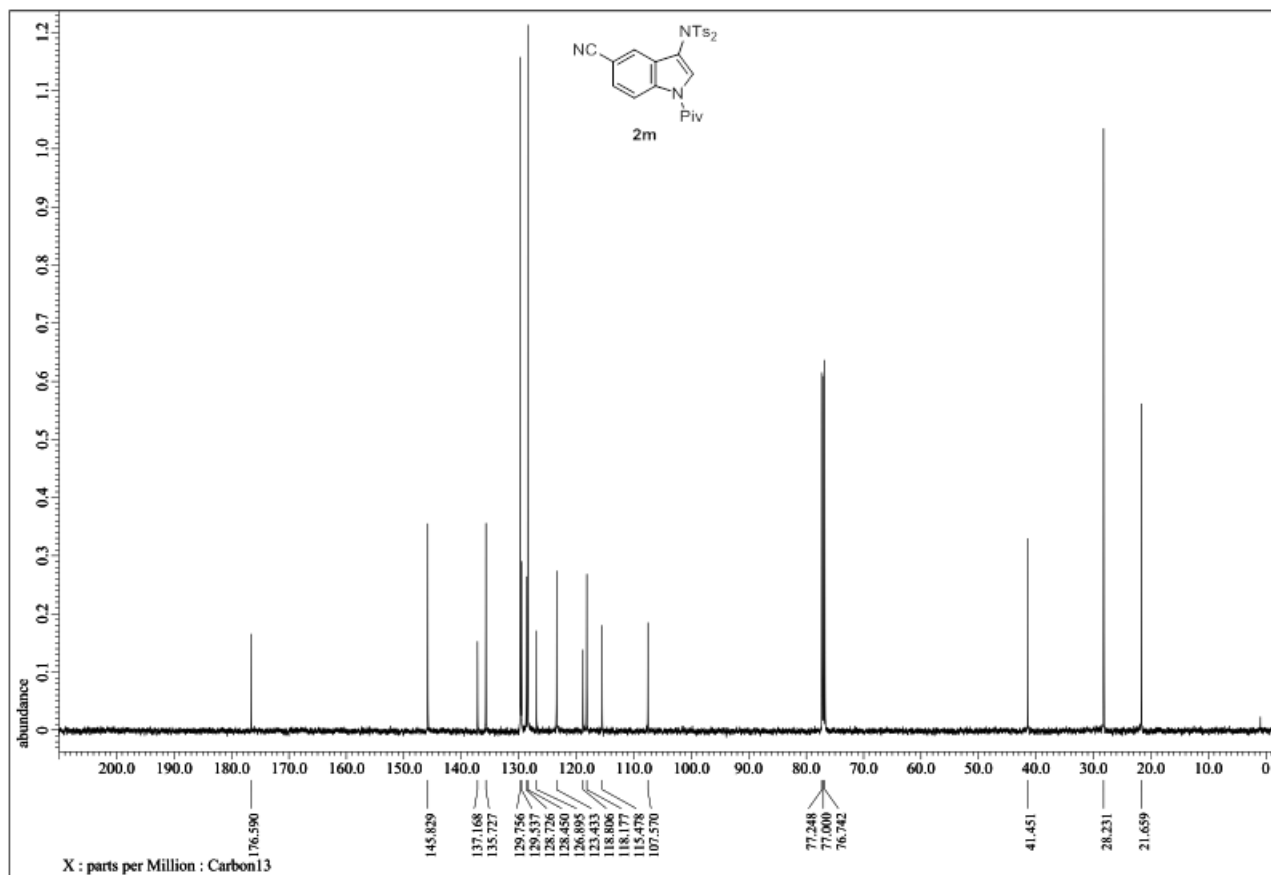

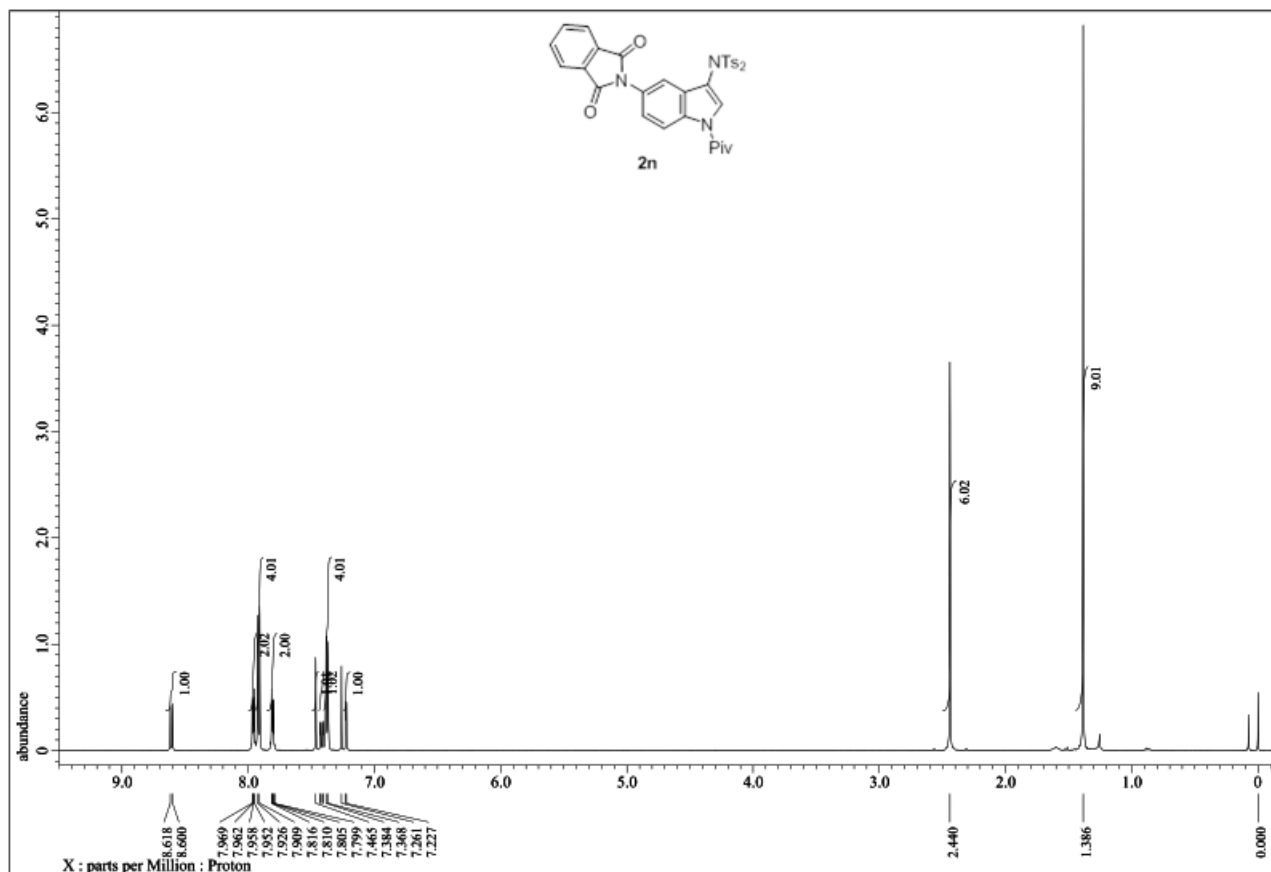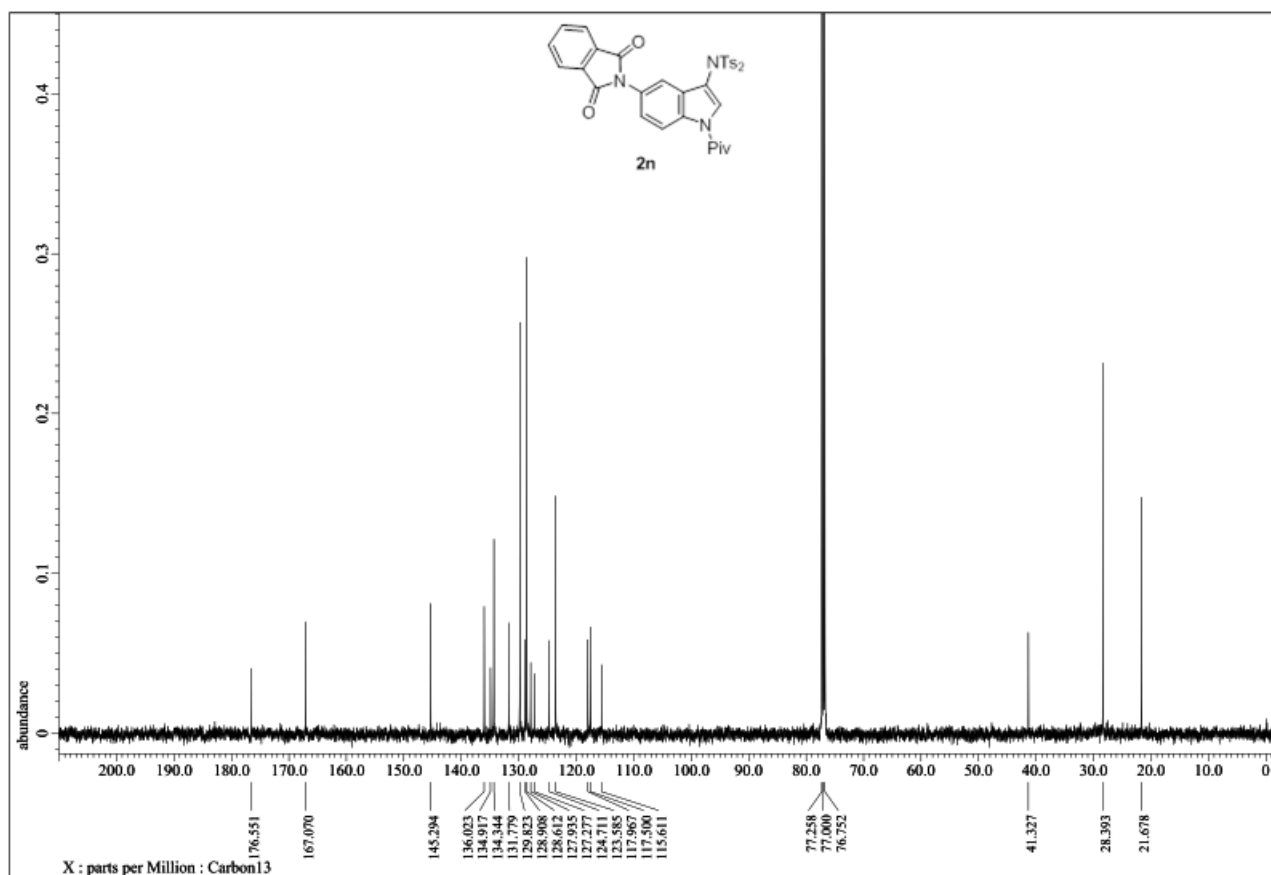

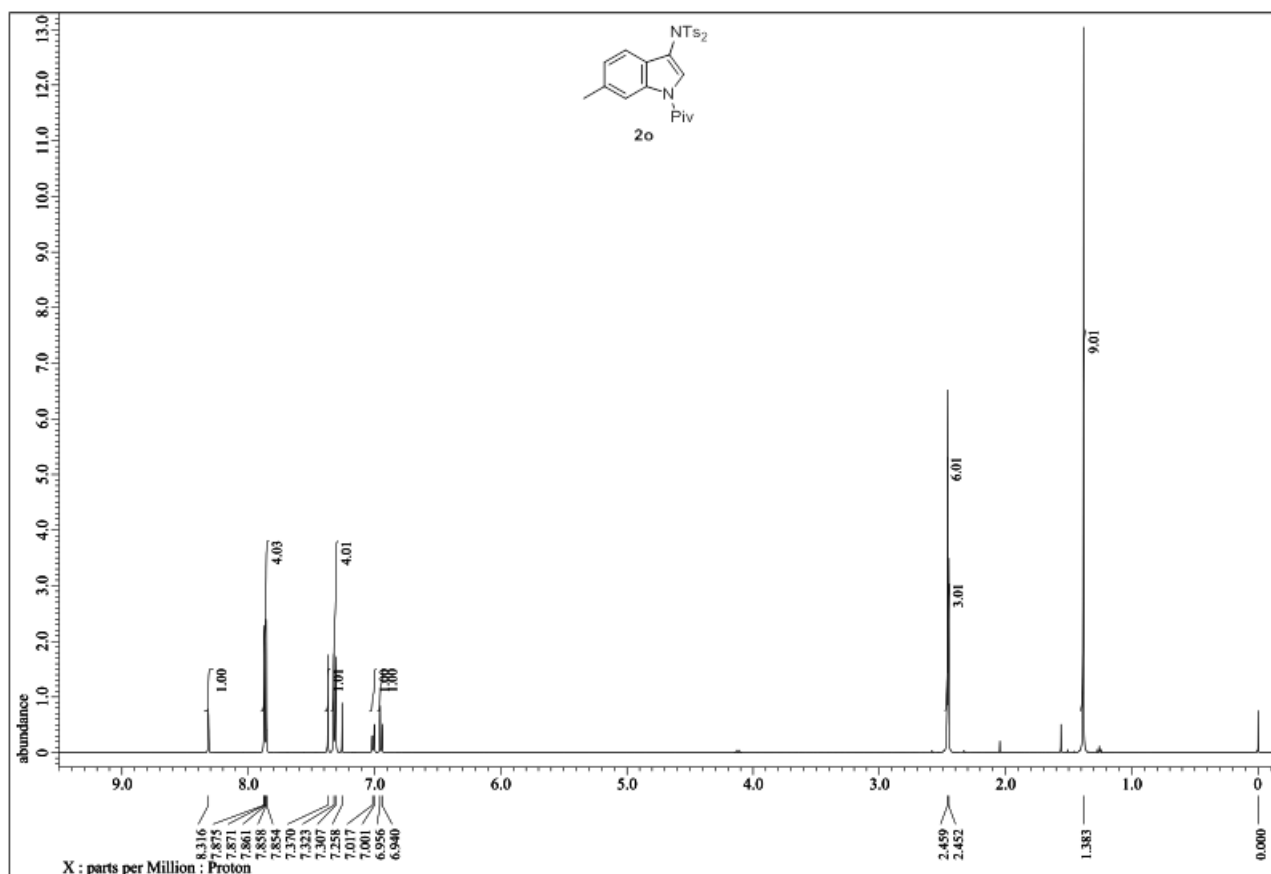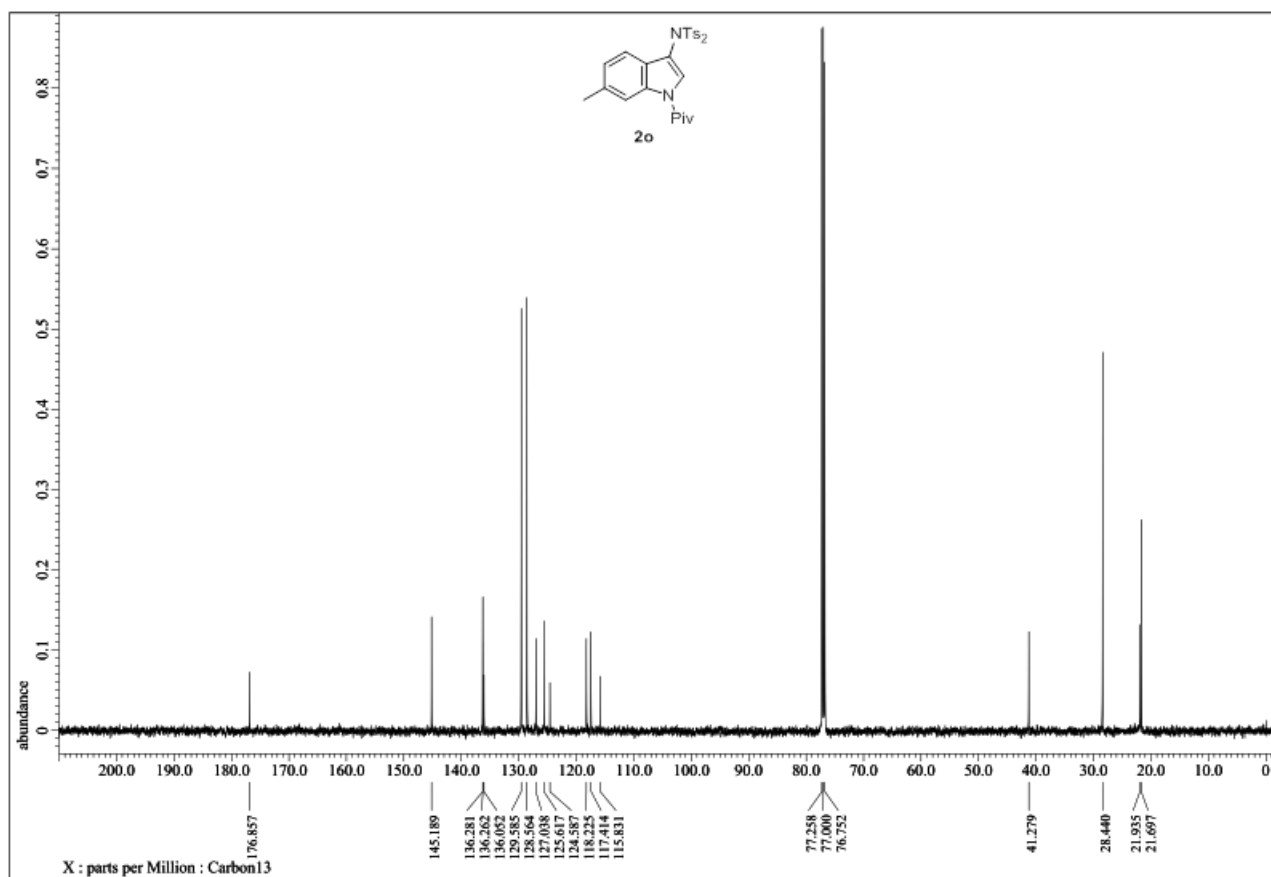

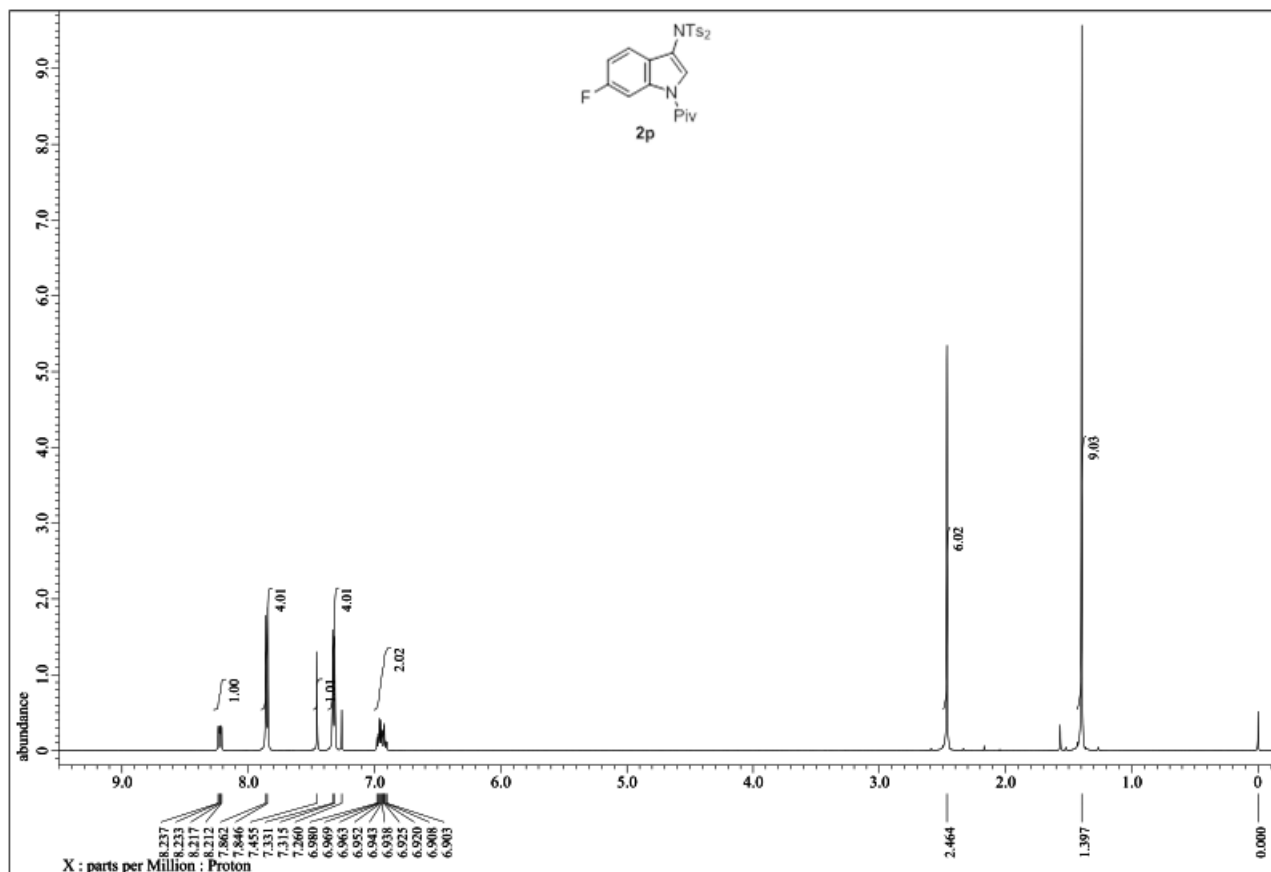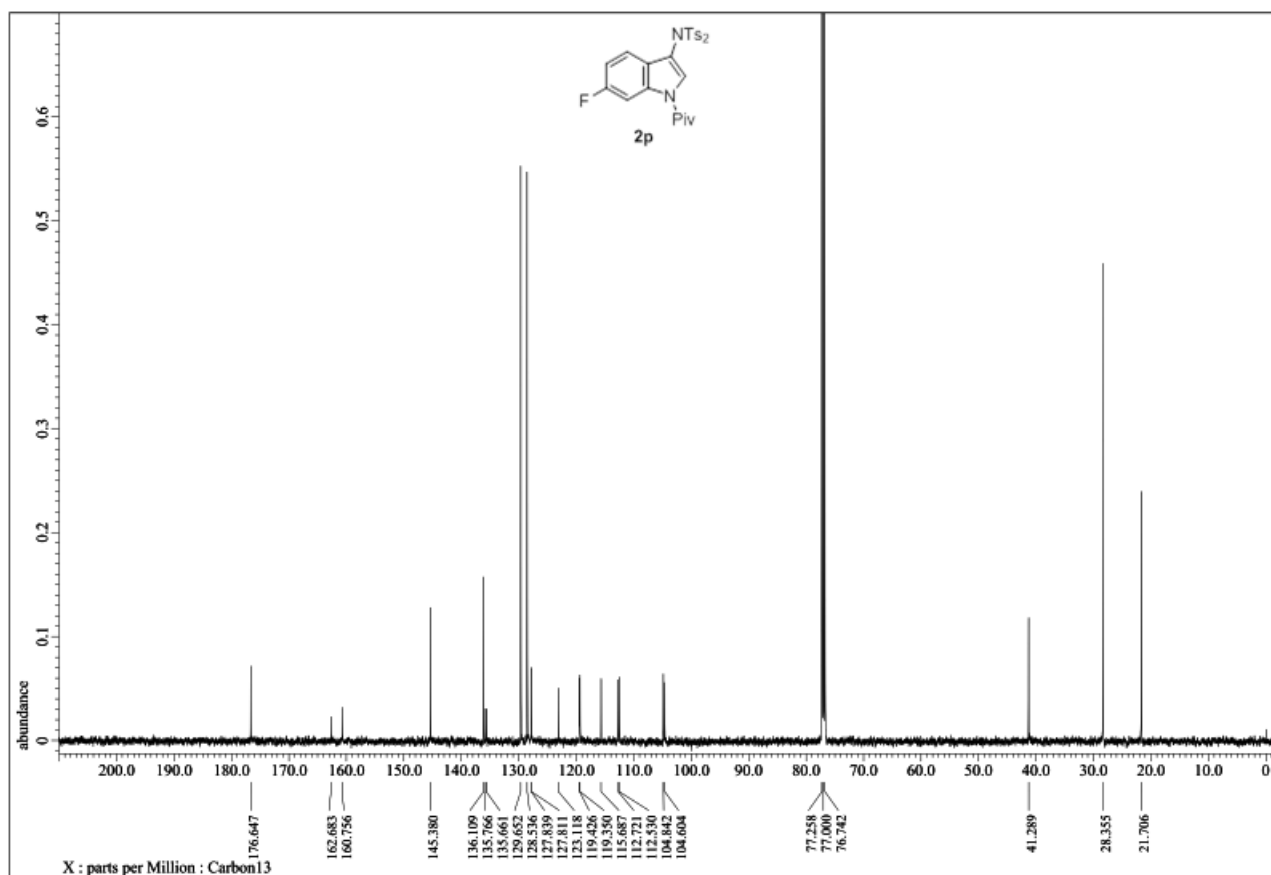

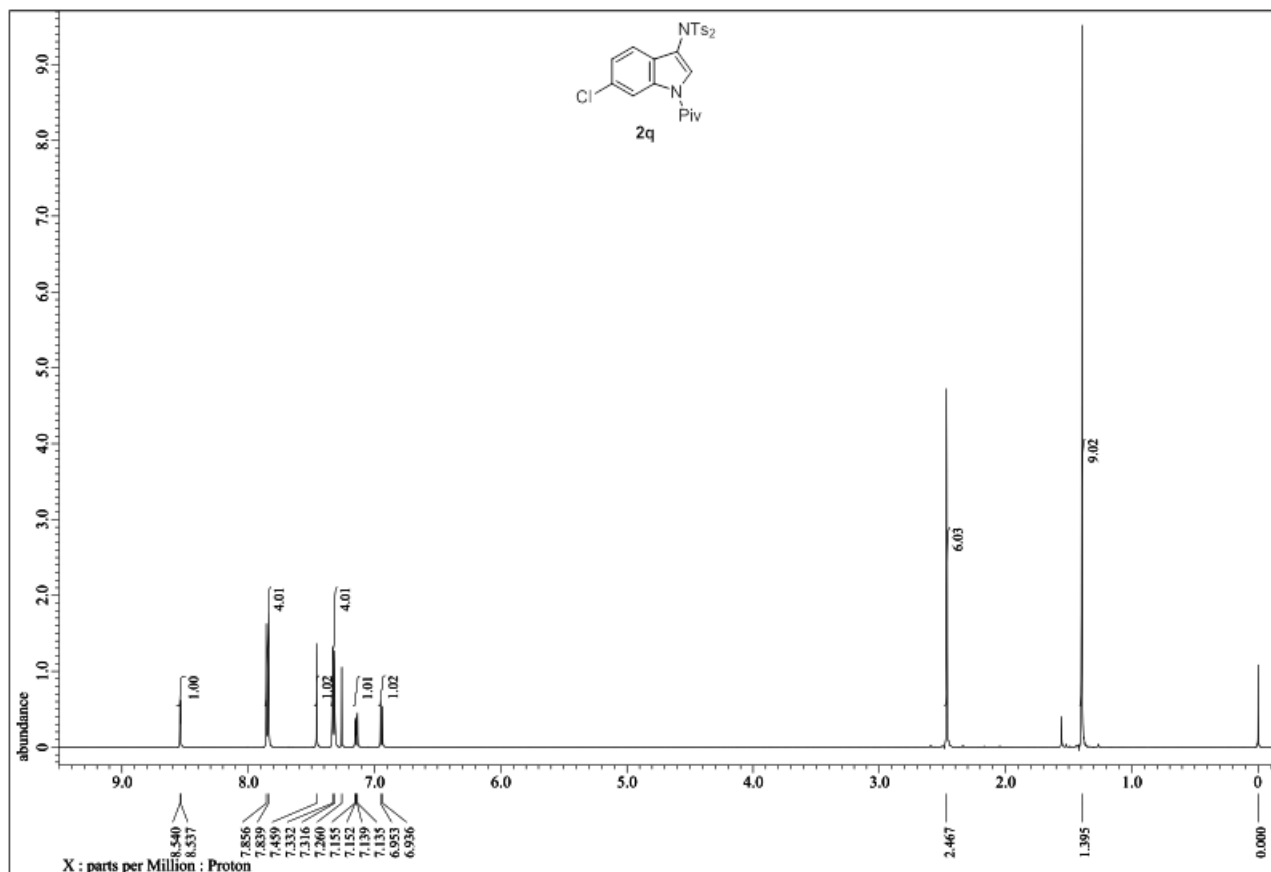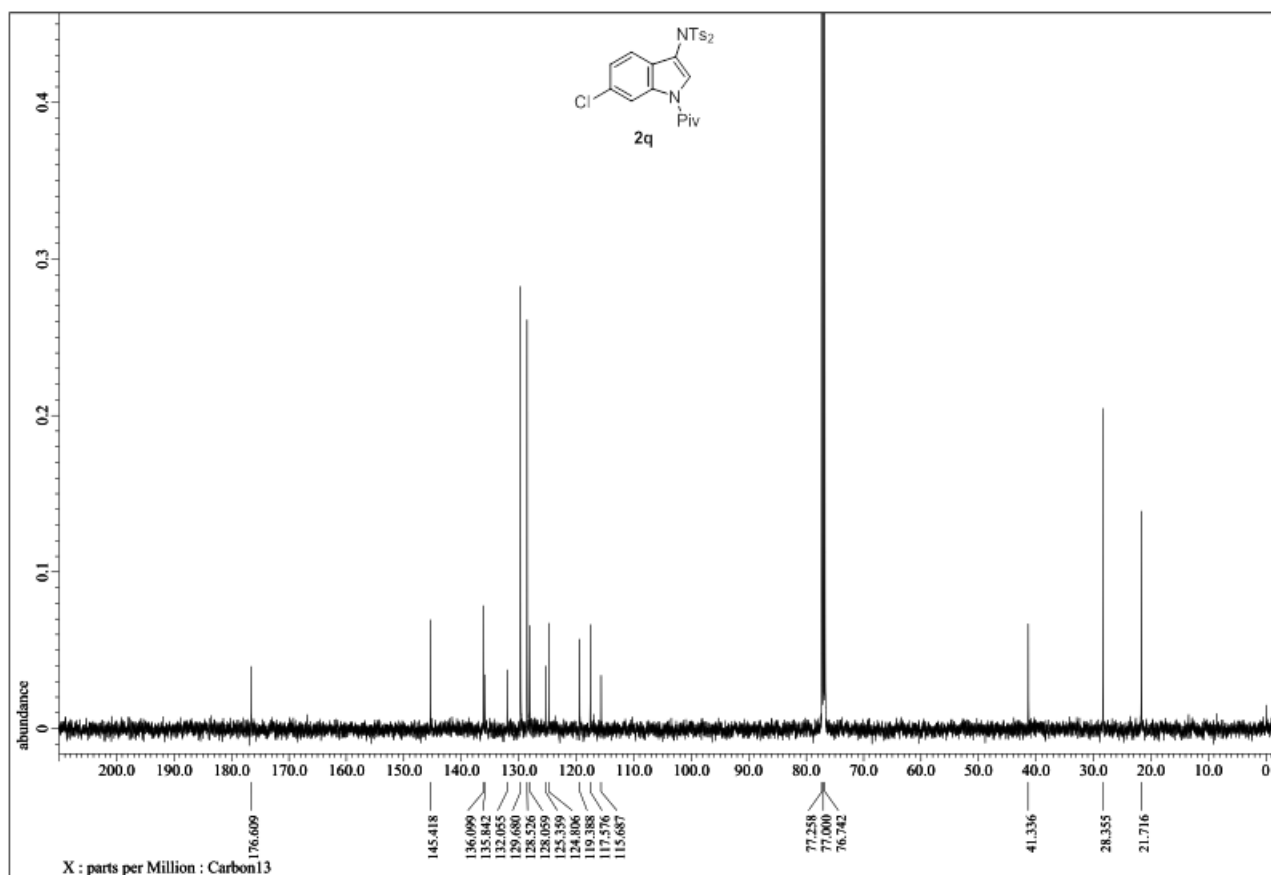

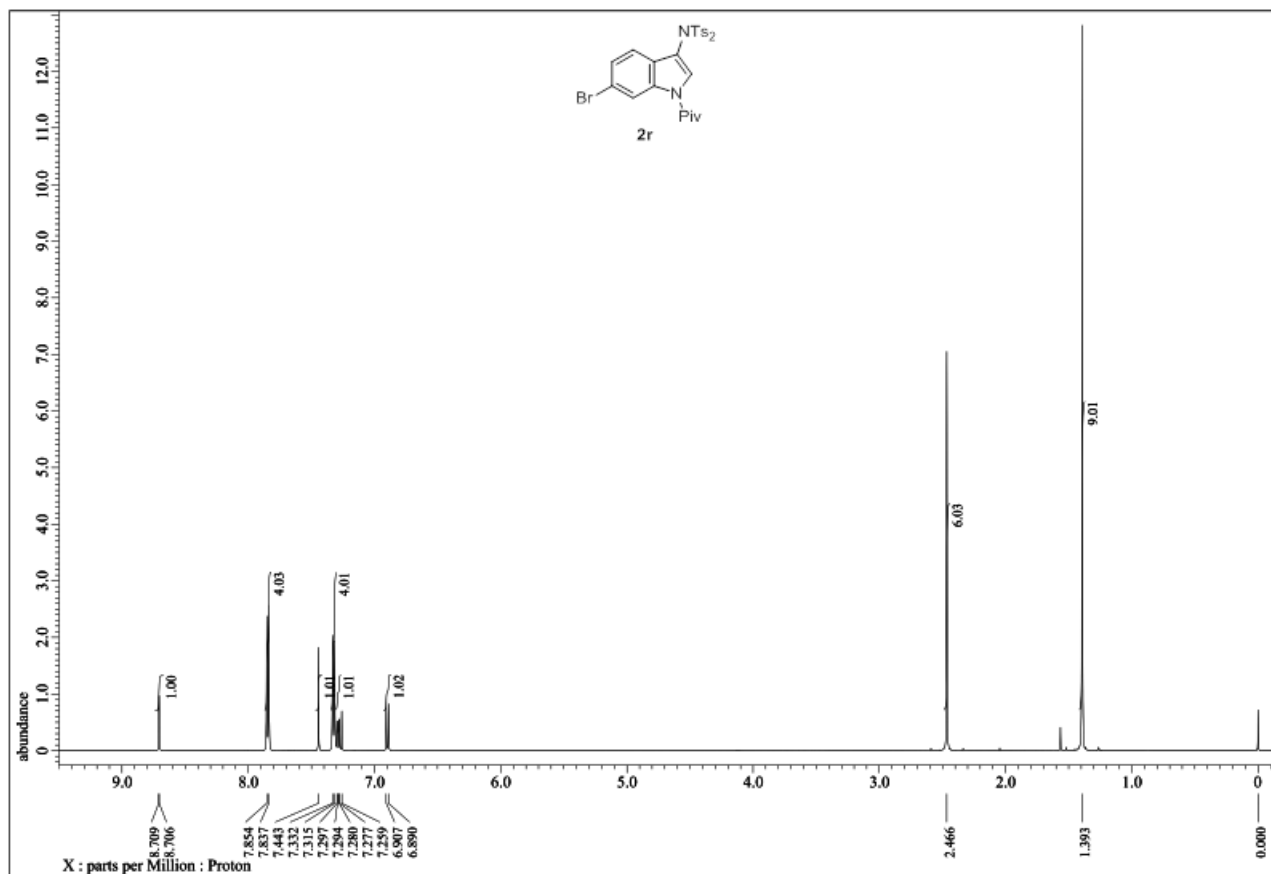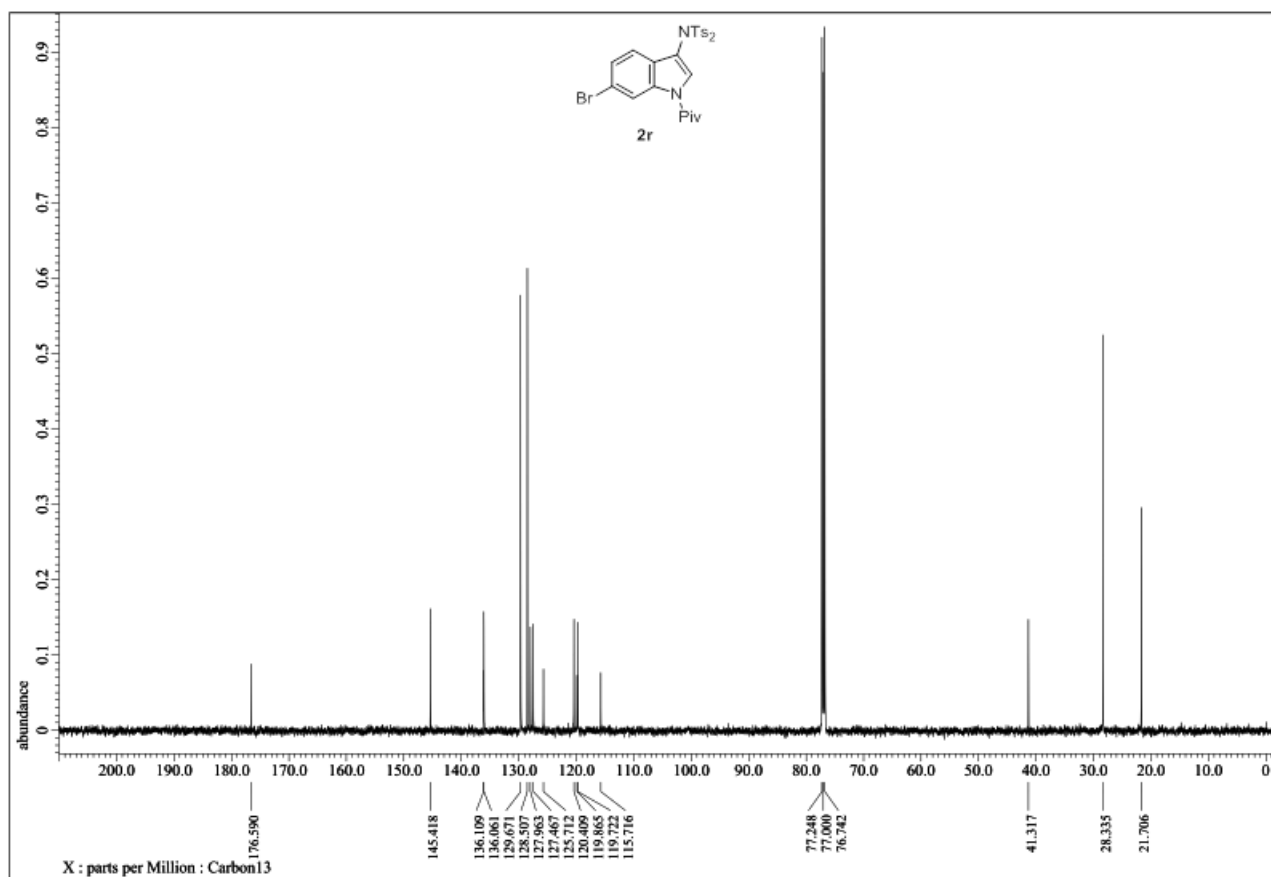

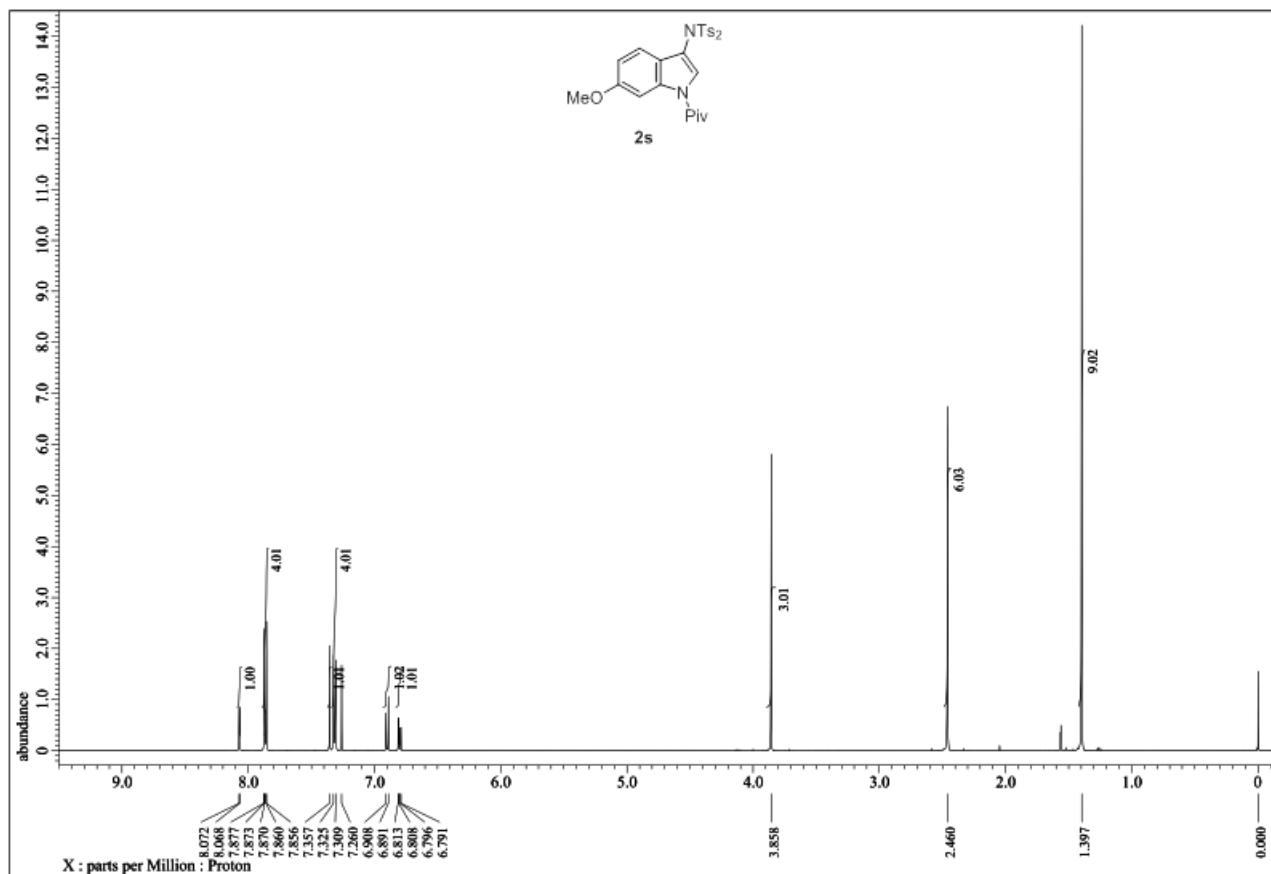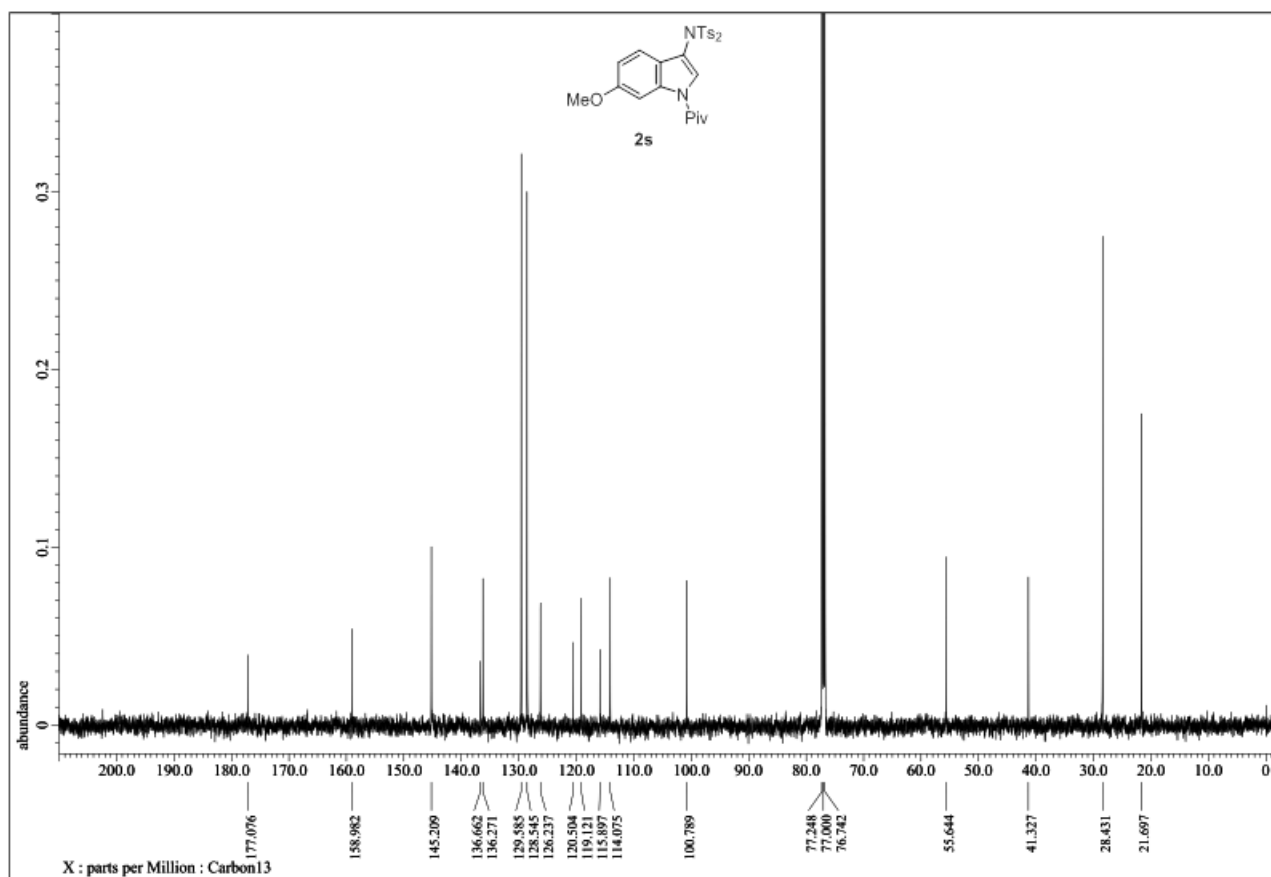

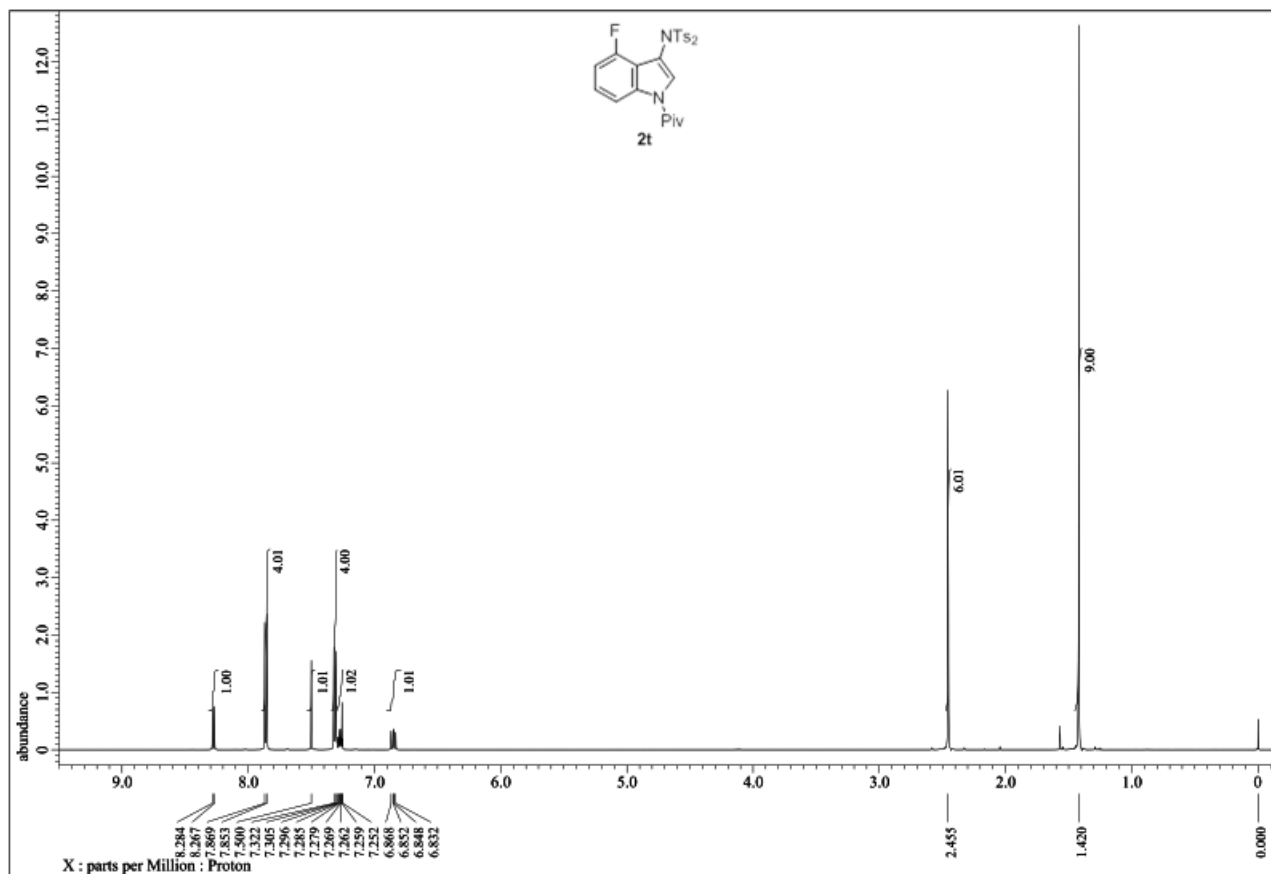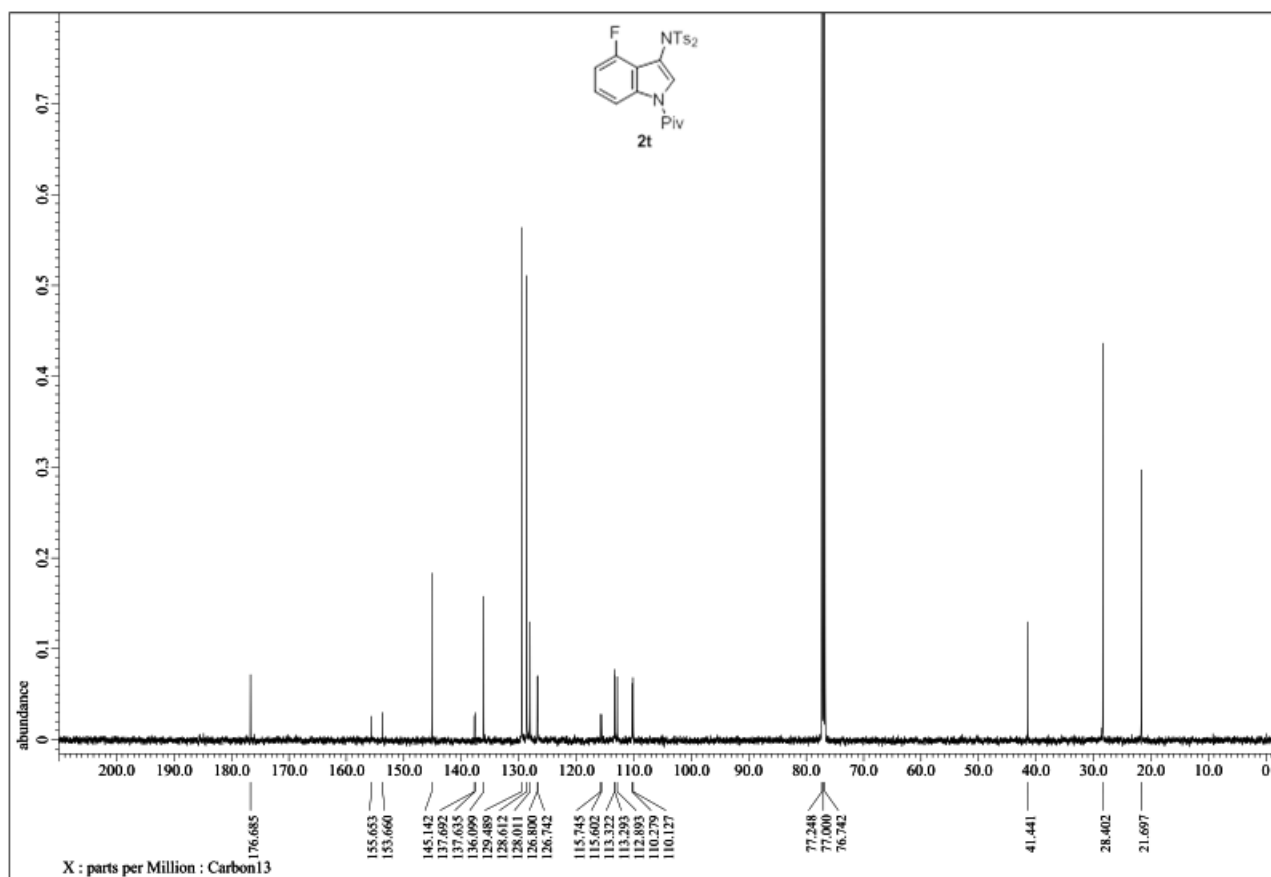

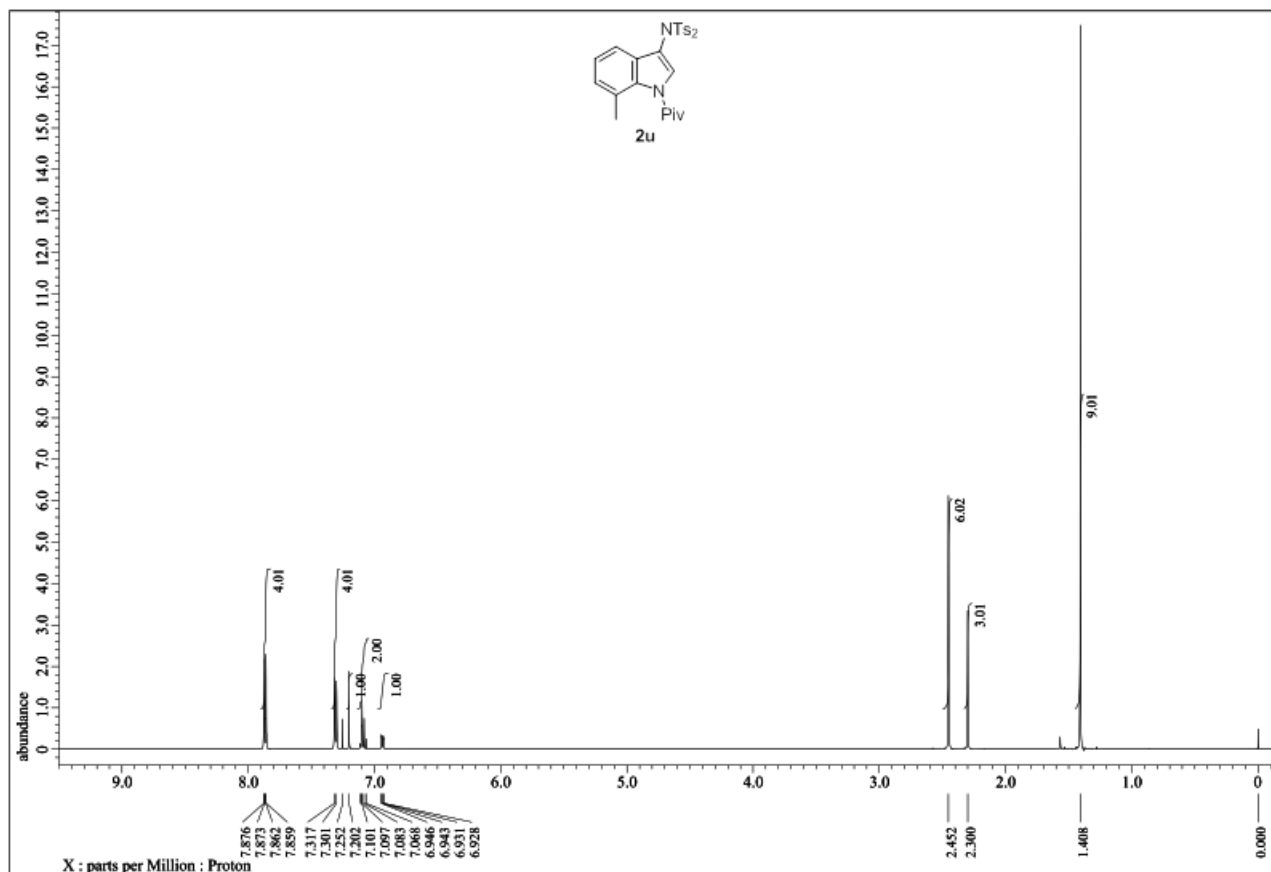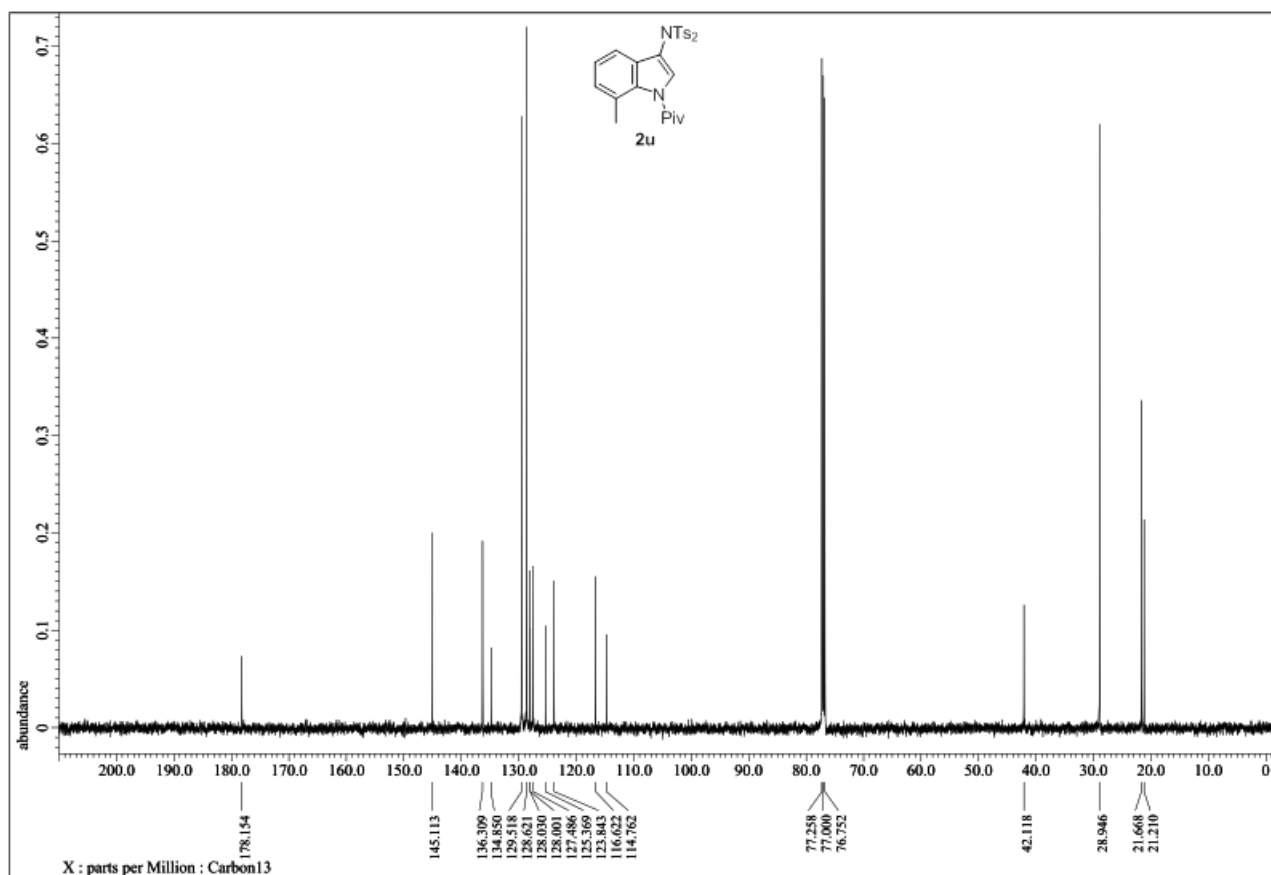

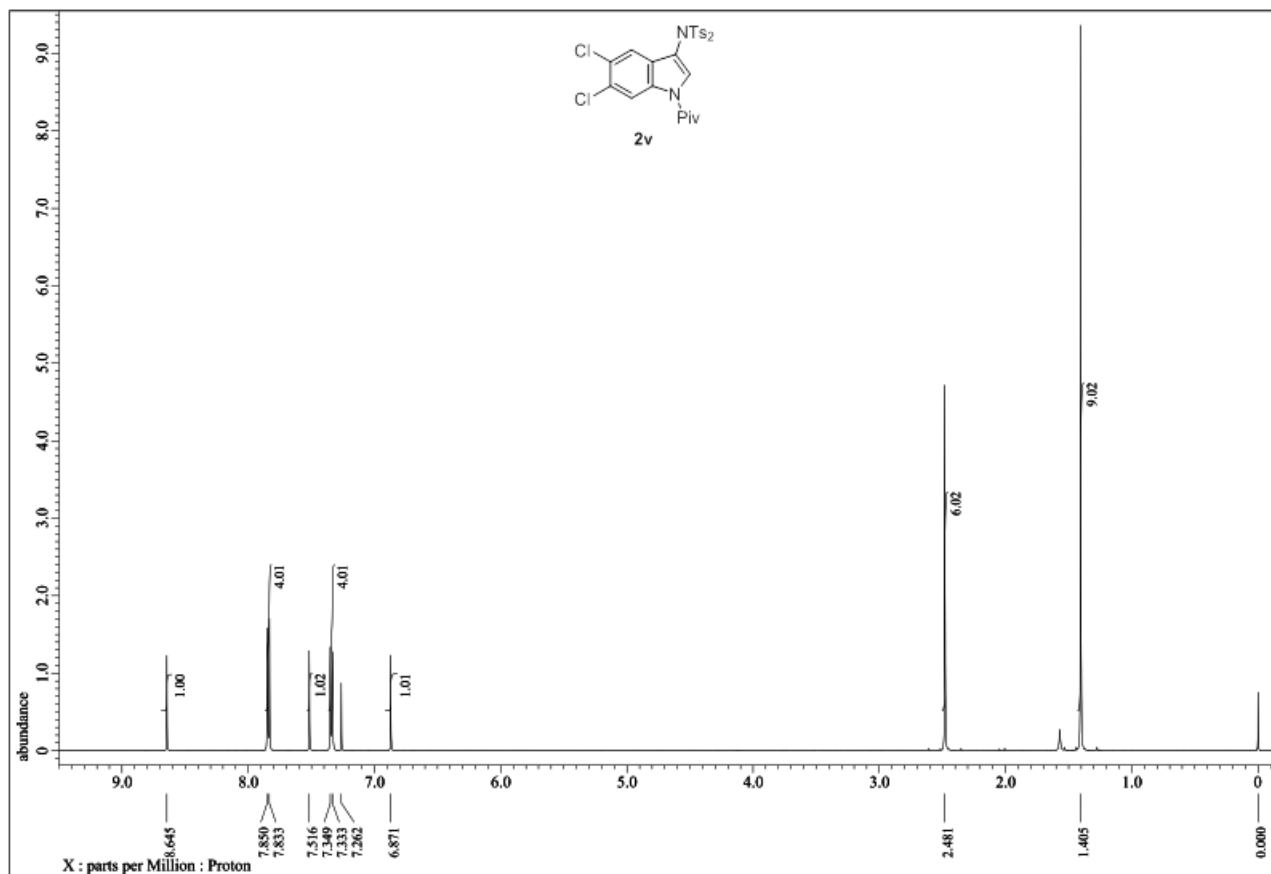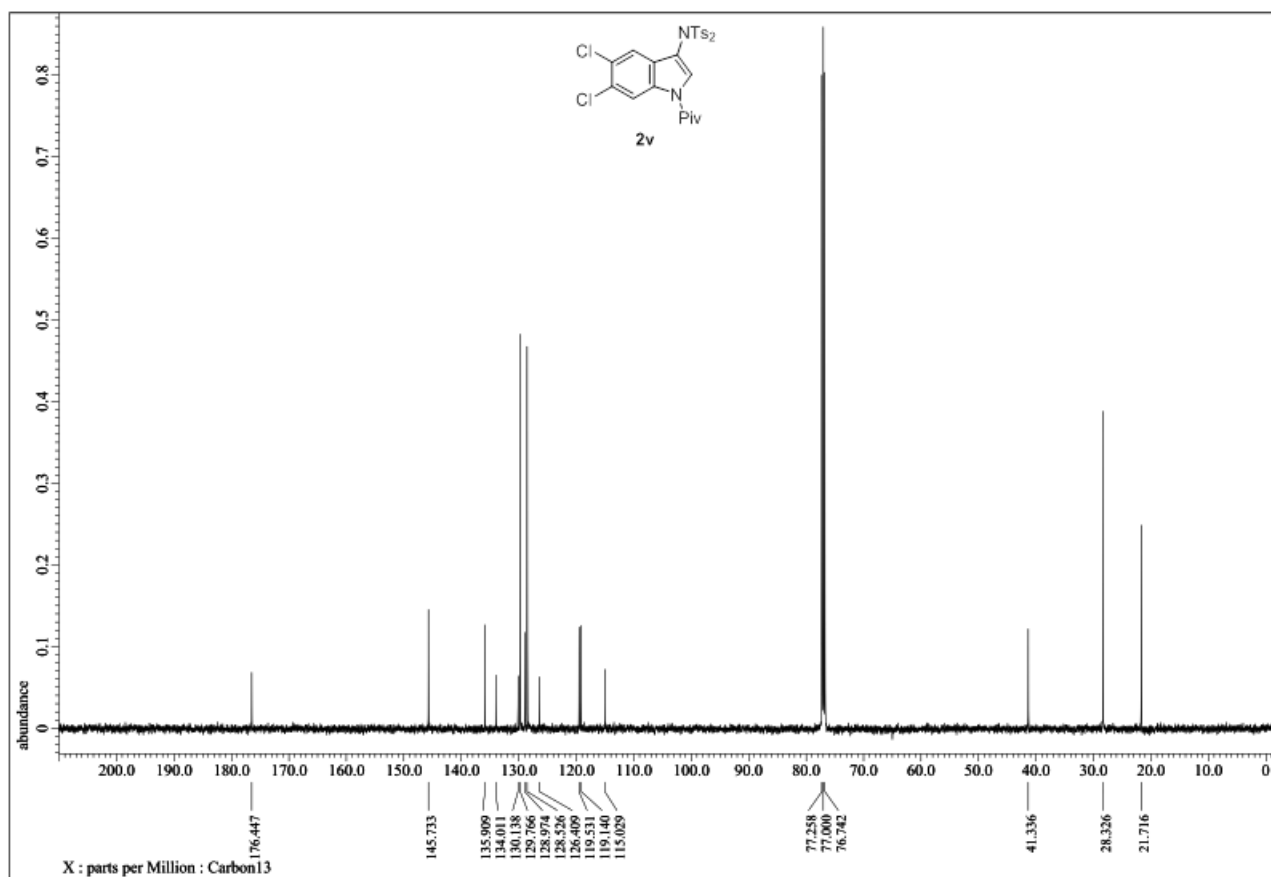

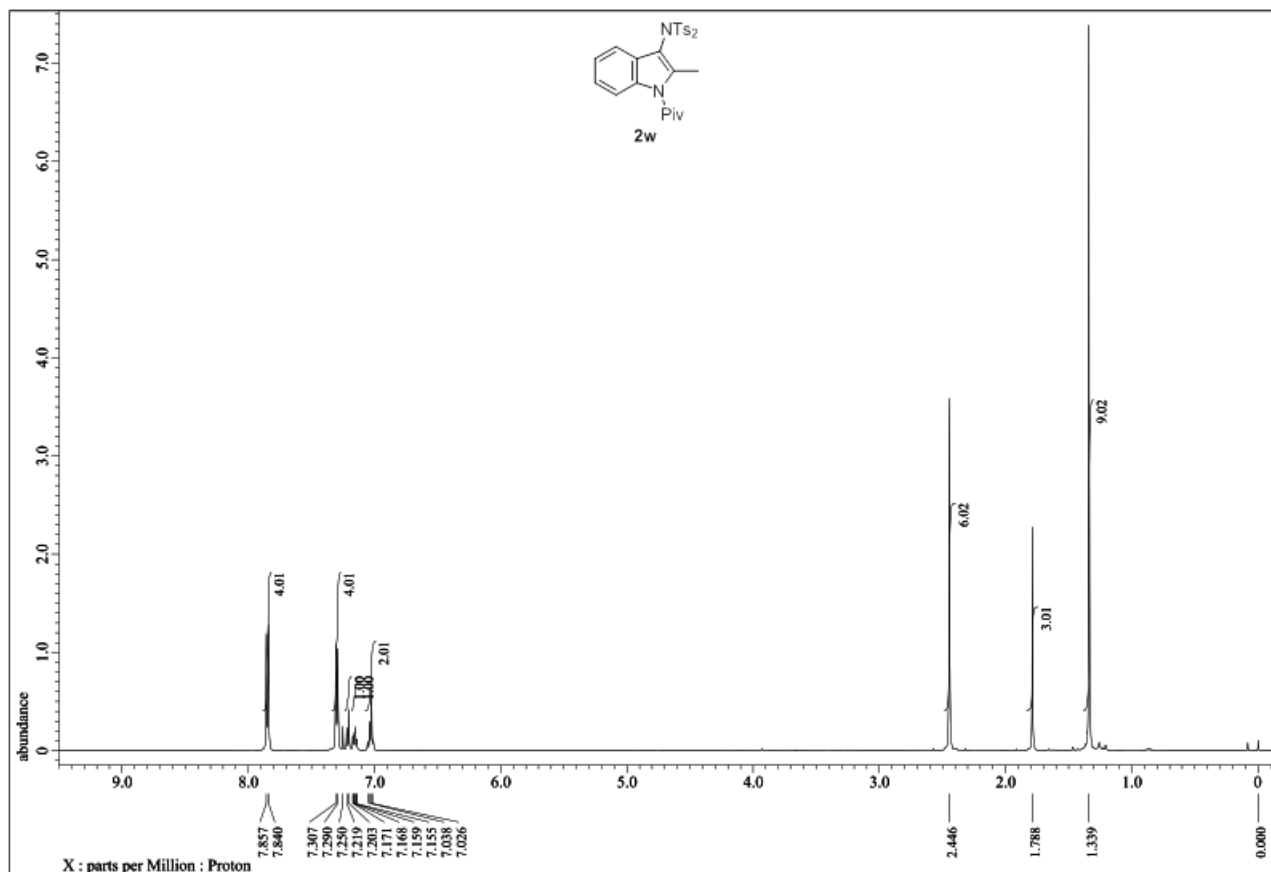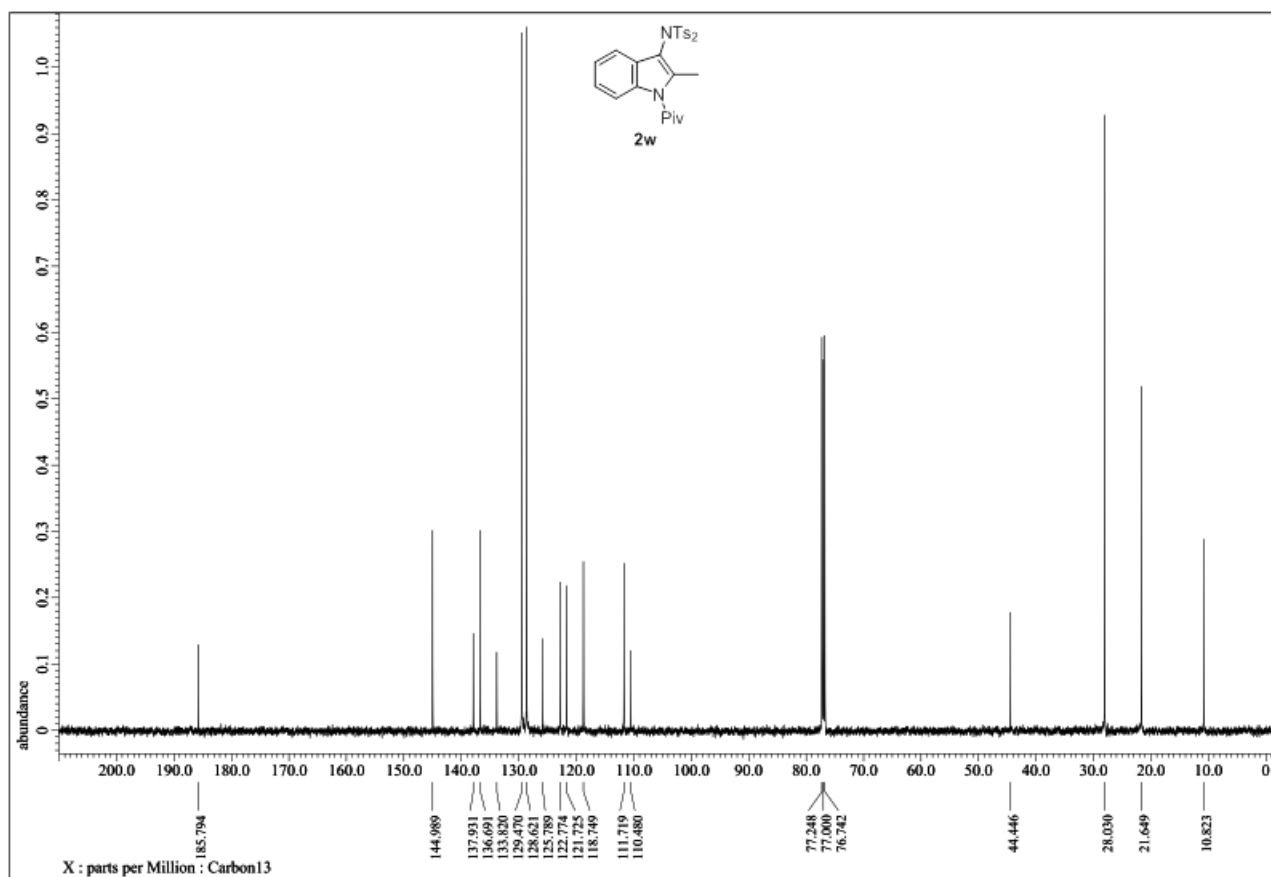

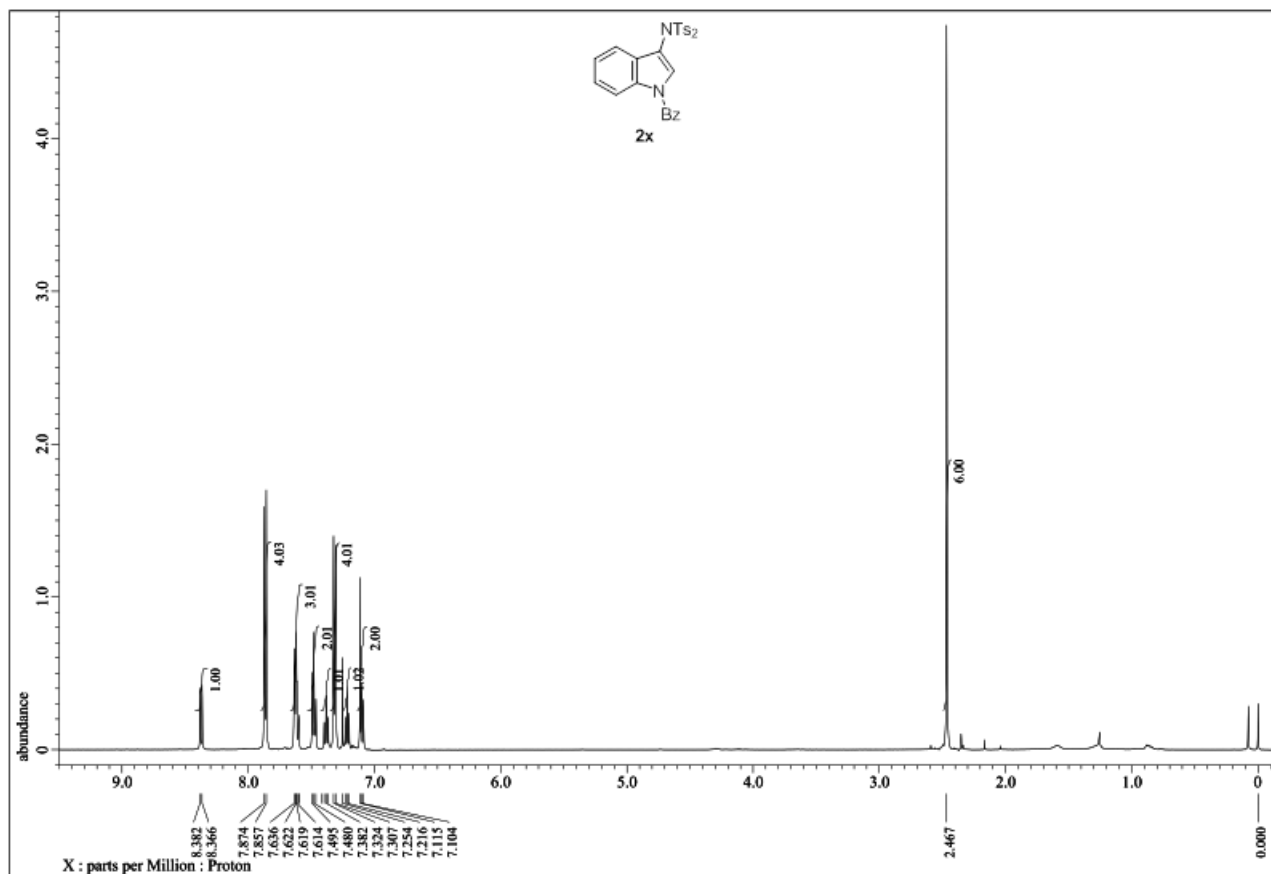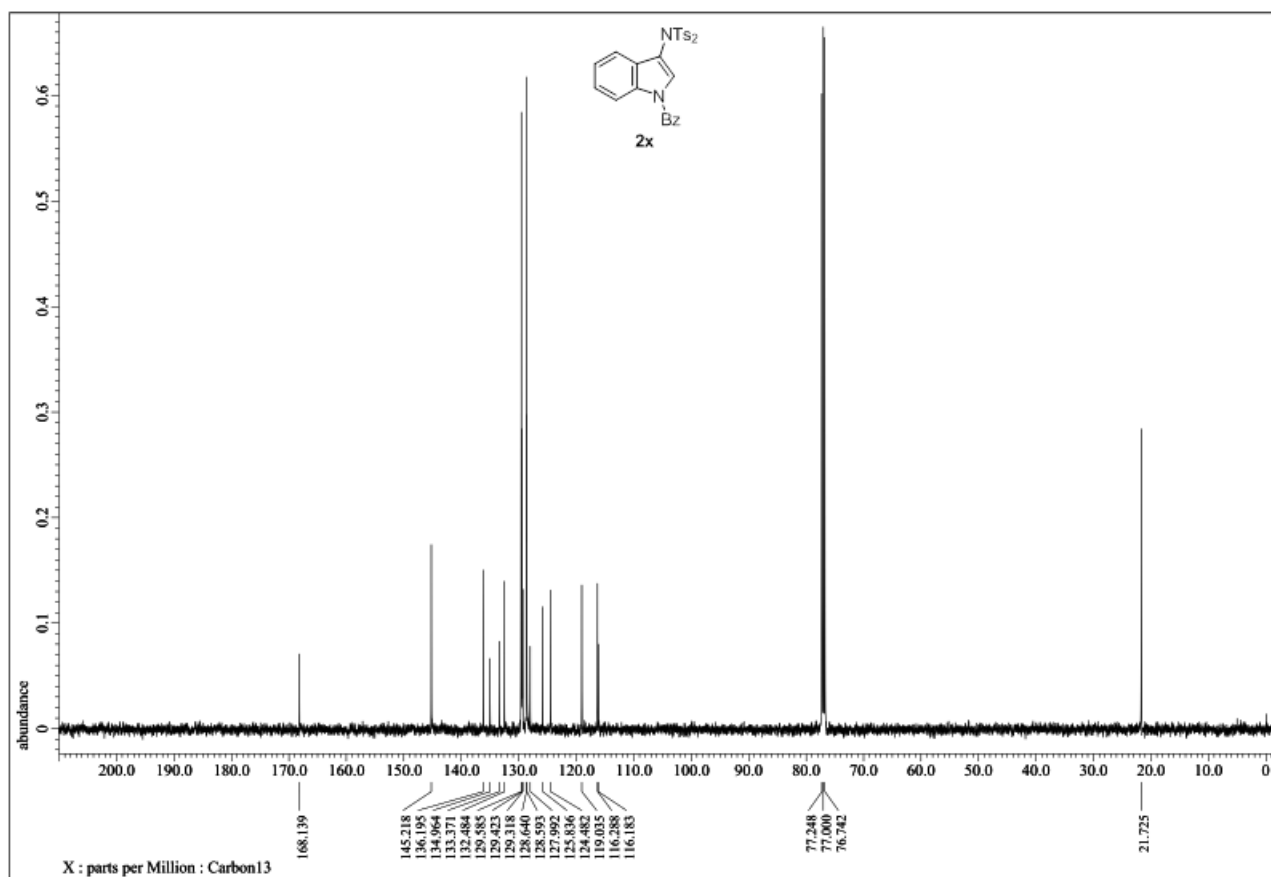

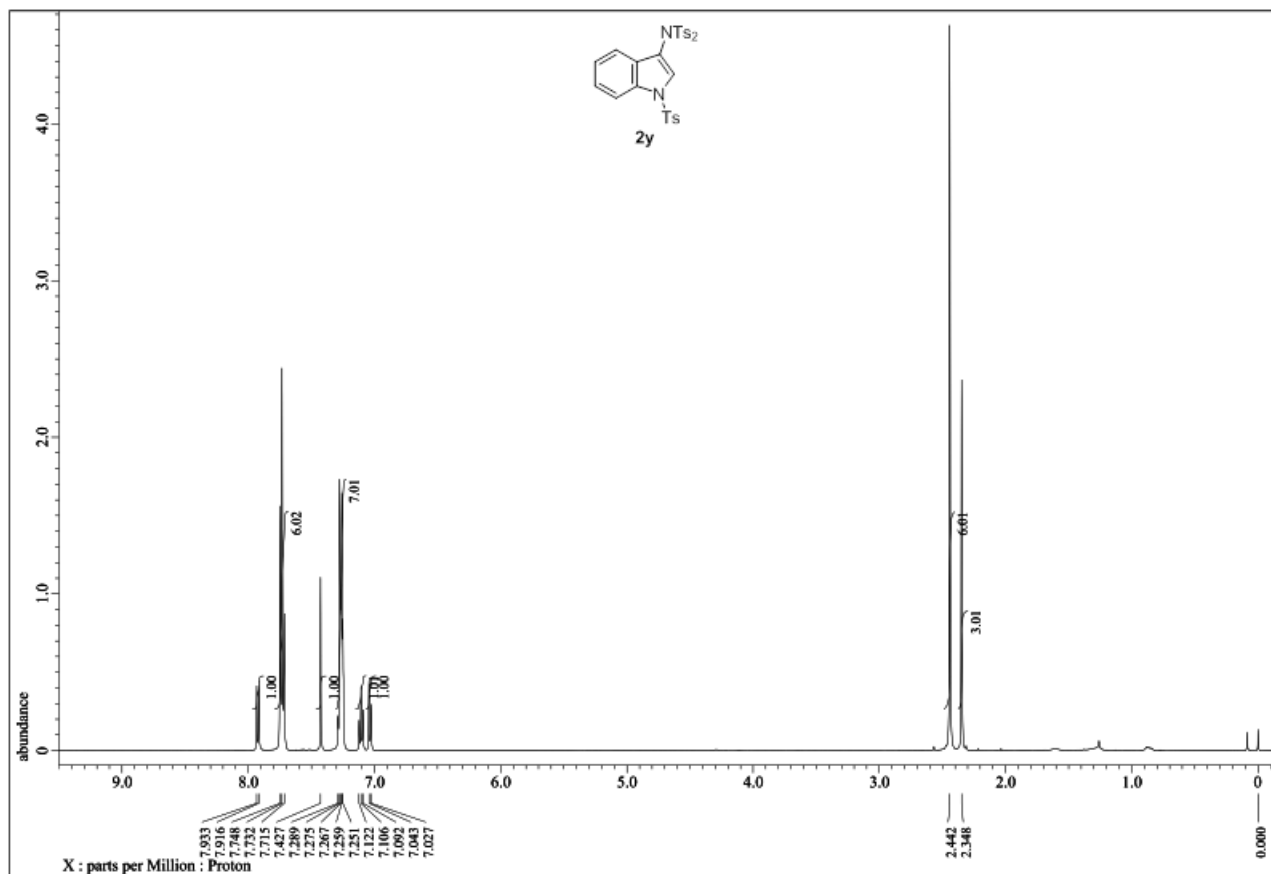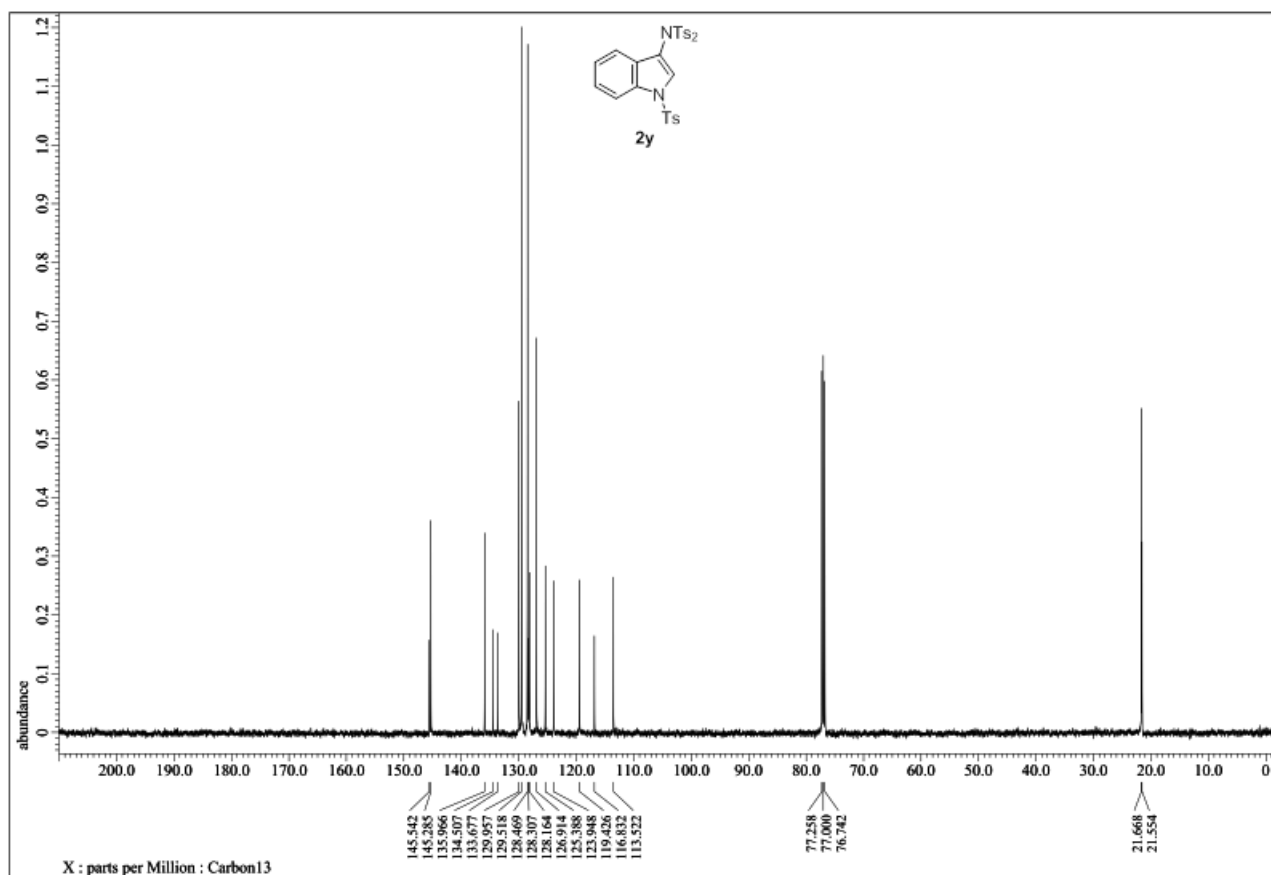

Supplement: Supplementary file 1 [file molecules-24-01147-s001.pdf]
